# Supplementary material for: In vitro construction of the COQ metabolon unveils the molecular determinants of coenzyme Q biosynthesis
Source: Nat Catal. Author manuscript; Available in PMC 2024 Feb 29. (PMC7615680; doi:10.1038/s41929-023-01087-z)
Supplement: Supplementary Data 1 [file EMS193170-supplement-Supplementary_Data_1.xlsx]

## Sheet: Supplementary_Figure_12
	[ATP] (μM)	[phosphate] (μM)
	300	5.86117	7.8258	6.64702
	200	6.74525	6.35233	6.64702
	100	6.05763	5.56647	5.46824
	75	5.27177	5.46824	4.38769
	50	4.87885	4.97708	4.48592
	25	2.91421	3.20891	3.01244
	10	1.83366	2.03012	2.71775
	5	2.12836	1.6372	1.93189

## Sheet: Supplementary_Figure_13
		raw HRMS				deconvolution
	Sample:	negative control		reaction		negative control		reaction
		m/z	Intensity	m/z	Intensity	m (Da)	Intensity	m (Da)	Intensity
		500.221	40	500.227	36	20000	24.2823	20000	4.57653
		500.249	40	500.23	54	20001	23.9415	20001	5.14222
		500.255	40	500.233	36	20002	23.8695	20002	6.6496
		501.225	40	500.237	36	20003	23.1327	20003	8.98912
		501.232	40	500.24	90	20004	21.8826	20004	11.5535
		501.235	40	500.244	54	20005	21.1536	20005	13.755
		501.246	60	500.247	54	20006	20.9708	20006	15.1314
		501.263	40	500.251	108	20007	20.3656	20007	15.145
		501.273	40	500.254	54	20008	18.4655	20008	13.8812
		502.772	40	500.257	108	20009	15.4683	20009	12.3012
		503.236	60	500.261	36	20010	12.6311	20010	11.025
		503.284	40	500.264	54	20011	10.7741	20011	10.2808
		504.225	60	500.268	36	20012	9.58024	20012	10.3676
		504.249	40	500.278	36	20013	8.91495	20013	10.8915
		505.202	40	500.285	36	20014	9.45303	20014	11.1837
		505.206	40	500.727	36	20015	11.4163	20015	11.3198
		505.212	60	500.751	36	20016	13.9178	20016	12.0361
		505.216	60	500.754	36	20017	16.4358	20017	14.4455
		505.223	80	500.764	36	20018	19.3151	20018	18.4154
		505.226	99	501.2	36	20019	21.3801	20019	21.2584
		505.23	40	501.22	36	20020	20.1733	20020	20.8196
		505.233	40	501.224	36	20021	15.9178	20021	18.2014
		505.237	80	501.23	36	20022	11.704	20022	15.3491
		505.24	60	501.234	36	20023	9.81918	20023	13.0158
		505.267	40	501.241	36	20024	10.2875	20024	11.5652
		505.274	40	501.248	36	20025	11.9511	20025	11.0365
		505.288	40	501.254	54	20026	13.4727	20026	10.6902
		505.292	40	501.258	36	20027	13.8548	20027	9.97185
		505.298	40	501.261	54	20028	12.7256	20028	9.59045
		505.305	40	501.265	36	20029	10.4648	20029	10.1889
		505.312	40	501.752	36	20030	8.11722	20030	10.6927
		505.784	60	502.177	36	20031	6.57888	20031	10.1366
		505.787	40	502.239	36	20032	6.01587	20032	9.12778
		505.794	119	502.252	36	20033	6.42502	20033	8.15999
		505.801	60	503.114	36	20034	8.24435	20034	7.4525
		505.804	40	503.227	36	20035	11.672	20035	7.65217
		506.221	40	503.238	36	20036	15.4871	20036	8.59361
		506.228	40	505.201	54	20037	18.5844	20037	9.40043
		506.238	40	505.208	36	20038	22.5463	20038	10.5179
		506.242	40	505.211	36	20039	29.545	20039	13.4118
		506.245	40	505.221	36	20040	38.5387	20040	18.2659
		506.249	40	505.225	36	20041	46.3743	20041	23.8868
		506.276	40	505.256	36	20042	50.4598	20042	28.0004
		506.287	60	505.27	54	20043	49.1485	20043	27.5979
		506.297	40	505.28	36	20044	43.3404	20044	22.9261
		506.945	40	505.283	72	20045	36.2597	20045	17.8392
		507.769	40	505.287	36	20046	30.3284	20046	14.3837
		507.921	40	505.29	72	20047	28.2296	20047	12.2837
		508.238	99	505.294	90	20048	32.0938	20048	11.7106
		508.242	80	505.297	72	20049	38.5944	20049	12.3369
		508.245	80	505.301	36	20050	43.3707	20050	12.8999
		508.249	139	505.304	54	20051	46.8393	20051	13.3593
		508.252	139	505.307	36	20052	47.6466	20052	14.0875
		508.256	99	505.314	36	20053	41.4077	20053	14.0832
		508.259	179	505.793	54	20054	30.0503	20054	12.9869
		508.263	40	506.282	36	20055	20.6928	20055	11.8718
		508.266	60	507.233	36	20056	16.3605	20056	10.9197
		508.269	60	507.281	36	20057	14.8505	20057	9.2827
		508.273	119	508.247	72	20058	13.5875	20058	6.89155
		508.276	60	508.251	126	20059	11.8119	20059	4.65828
		508.28	99	508.254	54	20060	9.76198	20060	3.39442
		509.25	40	508.258	126	20061	7.7498	20061	3.08918
		509.261	80	508.261	161	20062	5.9065	20062	3.05113
		509.264	80	508.265	144	20063	4.44221	20063	2.75692
		509.268	60	508.268	144	20064	3.74821	20064	2.26129
		509.271	40	508.272	72	20065	3.9495	20065	1.76243
		509.274	40	508.278	36	20066	4.50322	20066	1.37302
		510.26	40	508.285	36	20067	4.53736	20067	1.19554
		510.263	40	508.292	36	20068	3.84963	20068	1.23964
		511.263	40	509.232	36	20069	2.95035	20069	1.34473
		512.233	60	509.245	36	20070	2.16351	20070	1.33921
		512.236	40	509.259	36	20071	1.52092	20071	1.24426
		512.306	60	509.263	36	20072	1.03004	20072	1.21064
		512.829	40	509.266	36	20073	0.67806	20073	1.28656
		513.231	40	509.273	72	20074	0.478939	20074	1.35393
		514.203	40	509.28	54	20075	0.43977	20075	1.35047
		514.213	99	509.283	36	20076	0.510165	20076	1.41362
		514.286	40	509.301	36	20077	0.610281	20077	1.72779
		514.748	40	510.258	36	20078	0.672892	20078	2.31102
		514.911	40	510.307	36	20079	0.68415	20079	2.93388
		515.252	40	511.241	36	20080	0.674551	20080	3.32806
		515.711	40	511.265	36	20081	0.673194	20081	3.49903
		516.236	40	511.269	54	20082	0.663791	20082	3.60358
		516.246	60	511.276	36	20083	0.625812	20083	3.69741
		516.257	60	511.715	36	20084	0.60578	20084	3.83856
		516.935	40	512.211	36	20085	0.640676	20085	3.99155
		517.002	60	512.228	36	20086	0.701073	20086	3.91155
		517.249	40	512.294	36	20087	0.781415	20087	3.61193
		517.263	40	512.322	36	20088	0.904523	20088	3.41705
		517.27	40	513.23	36	20089	1.01743	20089	3.36569
		517.277	40	513.258	36	20090	1.03925	20090	3.29219
		517.284	60	513.282	36	20091	1.03073	20091	3.17882
		517.294	60	513.809	36	20092	1.16894	20092	2.95058
		517.297	60	514.208	54	20093	1.55659	20093	2.55159
		517.928	40	514.215	36	20094	2.13029	20094	2.20904
		517.935	40	514.222	72	20095	2.73657	20095	2.31387
		522.244	40	514.365	36	20096	3.40385	20096	3.34284
		522.251	40	515.205	36	20097	4.37927	20097	5.52753
		522.261	40	515.24	54	20098	5.49287	20098	8.04467
		522.268	40	515.244	36	20099	5.98597	20099	9.5253
		522.593	40	515.251	36	20100	5.42814	20100	9.44908
		523.262	40	515.264	36	20101	4.22026	20101	8.02621
		523.364	40	515.282	36	20102	3.02571	20102	6.02521
		523.49	40	515.289	36	20103	2.20461	20103	4.66836
		524.247	40	515.296	36	20104	1.86699	20104	4.57089
		524.299	80	516.228	36	20105	1.98541	20105	5.59007
		524.468	40	516.242	36	20106	2.29765	20106	7.17976
		525.169	40	516.245	36	20107	2.44294	20107	8.67962
		525.246	40	516.248	36	20108	2.4006	20108	9.83998
		525.25	40	516.252	72	20109	2.47414	20109	10.2714
		525.31	40	516.259	36	20110	2.6585	20110	9.33836
		525.313	40	517.251	54	20111	2.69828	20111	7.43444
		526.264	40	517.258	72	20112	2.71239	20112	5.68764
		526.275	40	517.265	36	20113	2.87336	20113	4.57345
		526.293	40	517.268	36	20114	2.95133	20114	3.82583
		526.296	40	517.293	36	20115	2.78528	20115	3.09017
		526.31	40	518.261	36	20116	2.50287	20116	2.29572
		527.287	40	519.244	36	20117	2.19749	20117	1.60181
		528.244	60	519.286	36	20118	1.96884	20118	1.19566
		530.812	40	520.306	36	20119	2.02389	20119	1.19223
		531.239	40	522.218	54	20120	2.33612	20120	1.50596
		531.253	40	522.256	36	20121	2.4972	20121	1.7627
		531.267	40	522.309	36	20122	2.24911	20122	1.68301
		531.271	40	522.316	36	20123	1.7883	20123	1.46999
		532.238	60	522.963	36	20124	1.3471	20124	1.4264
		532.249	60	523.226	36	20125	0.962133	20125	1.51362
		532.252	40	523.233	36	20126	0.629294	20126	1.64826
		532.27	60	523.271	36	20127	0.374779	20127	2.01079
		532.277	40	523.275	36	20128	0.228155	20128	2.79443
		532.8	40	523.292	36	20129	0.192407	20129	4.05893
		533.224	40	523.299	36	20130	0.247362	20130	5.66254
		533.231	40	524.179	36	20131	0.387449	20131	6.99807
		533.235	60	524.245	36	20132	0.646969	20132	7.67225
		533.238	40	525.27	72	20133	1.0472	20133	8.26239
		533.245	60	525.28	36	20134	1.46402	20134	9.09061
		533.259	40	526.27	36	20135	1.68045	20135	9.30277
		533.266	60	526.302	36	20136	1.65788	20136	8.35769
		533.274	60	527.205	36	20137	1.48367	20137	6.90093
		533.284	60	527.247	36	20138	1.1864	20138	5.76752
		533.291	80	527.25	36	20139	0.853116	20139	5.45145
		533.298	40	528.197	36	20140	0.596443	20140	5.92961
		533.302	40	528.228	36	20141	0.421367	20141	6.41643
		533.305	40	529.27	54	20142	0.29183	20142	6.19476
		533.769	40	529.277	36	20143	0.186618	20143	5.34959
		534.239	80	529.306	36	20144	0.103232	20144	4.25792
		534.243	40	529.313	36	20145	0.0517706	20145	3.20701
		534.246	40	530.229	36	20146	0.032309	20146	2.41903
		534.25	40	530.25	72	20147	0.0329175	20147	2.01225
		534.253	80	530.254	36	20148	0.0412087	20148	2.17144
		534.257	60	530.282	36	20149	0.0498265	20149	3.1299
		534.26	40	530.747	36	20150	0.0562346	20150	4.9102
		534.271	40	531.234	36	20151	0.0606968	20151	7.34856
		534.285	40	531.262	36	20152	0.0659044	20152	10.0409
		534.289	60	531.273	54	20153	0.0732763	20153	12.1003
		534.296	40	531.753	36	20154	0.0794084	20154	12.664
		534.303	40	532.191	54	20155	0.0817032	20155	11.6664
		534.777	40	532.223	36	20156	0.0852353	20156	9.84172
		534.809	40	532.233	54	20157	0.100248	20157	8.33651
		535.245	40	532.24	36	20158	0.127917	20158	7.82826
		535.273	40	532.244	36	20159	0.155567	20159	7.96793
		535.28	40	532.251	72	20160	0.17832	20160	8.54888
		535.287	40	532.258	54	20161	0.210584	20161	10.1456
		536.276	40	532.272	36	20162	0.266796	20162	12.5367
		537.216	40	532.276	72	20163	0.347489	20163	14.4254
		538.231	40	532.283	54	20164	0.444293	20164	15.1742
		538.253	40	532.307	54	20165	0.523257	20165	14.8583
		538.26	40	532.311	36	20166	0.539975	20166	13.8279
		538.277	40	533.23	54	20167	0.540361	20167	12.9705
		539.244	40	533.244	36	20168	0.659192	20168	12.7182
		539.251	40	533.269	54	20169	0.930222	20169	12.9572
		539.273	40	533.272	36	20170	1.18721	20170	13.8099
		539.283	60	533.279	36	20171	1.24397	20171	14.5782
		540.247	40	533.283	54	20172	1.07454	20172	13.7533
		540.265	40	533.286	90	20173	0.782884	20173	11.2628
		540.268	40	533.29	72	20174	0.508057	20174	8.72189
		540.304	40	533.293	36	20175	0.334604	20175	7.60025
		540.311	60	533.297	54	20176	0.25716	20176	8.54103
		540.318	40	533.3	90	20177	0.234099	20177	11.0254
		540.322	40	533.304	36	20178	0.238256	20178	13.1262
		541.283	40	533.308	36	20179	0.250337	20179	13.3977
		541.29	40	533.315	54	20180	0.240517	20180	12.1094
		541.297	40	533.322	36	20181	0.197834	20181	9.99488
		541.305	40	533.332	36	20182	0.149817	20182	7.80831
		541.308	60	534.248	36	20183	0.124612	20183	6.39497
		541.34	40	534.256	108	20184	0.121722	20184	5.7677
		541.415	40	534.259	72	20185	0.12637	20185	5.22056
		541.615	40	534.291	36	20186	0.144937	20186	4.59987
		541.782	40	534.294	54	20187	0.222025	20187	4.26129
		541.786	40	534.305	36	20188	0.411247	20188	4.17077
		541.811	60	534.316	36	20189	0.748212	20189	4.03118
		541.832	40	535.254	36	20190	1.29695	20190	3.71729
		542.199	60	535.286	36	20191	2.2517	20191	3.42495
		542.203	60	535.3	54	20192	4.0095	20192	3.5425
		542.206	40	535.304	36	20193	6.98771	20193	4.00289
		542.274	40	536.285	54	20194	11.0199	20194	4.28295
		542.288	60	536.317	36	20195	14.8904	20195	4.28002
		542.292	40	537.282	36	20196	17.5937	20196	4.55288
		542.299	40	538.241	36	20197	19.7608	20197	5.63798
		542.302	60	539.236	36	20198	22.3318	20198	7.74794
		542.32	60	539.257	36	20199	25.5051	20199	11.402
		542.545	40	539.285	72	20200	28.2843	20200	17.0601
		543.241	40	539.958	36	20201	27.8004	20201	23.5899
		543.251	40	540.239	36	20202	22.8879	20202	28.4728
		543.283	40	540.256	54	20203	16.3473	20203	30.7451
		543.305	40	540.267	36	20204	11.0055	20204	32.377
		543.308	40	540.299	36	20205	7.43838	20205	34.2752
		543.312	99	540.303	36	20206	5.06285	20206	33.575
		543.537	40	540.317	72	20207	3.29634	20207	27.911
		544.269	60	540.321	54	20208	2.10225	20208	19.8791
		544.765	40	540.328	36	20209	1.4735	20209	13.9971
		544.783	40	540.331	72	20210	1.12589	20210	11.1359
		544.962	40	541.268	36	20211	0.829247	20211	9.38334
		545.241	60	541.275	36	20212	0.53192	20212	7.81741
		545.287	40	541.285	36	20213	0.300368	20213	6.77419
		545.752	40	541.3	90	20214	0.197004	20214	6.21271
		545.97	40	541.303	36	20215	0.190669	20215	5.69806
		546.085	40	541.314	36	20216	0.22077	20216	5.4179
		546.113	40	541.321	36	20217	0.261333	20217	5.93992
		546.214	60	541.325	36	20218	0.289102	20218	7.29956
		546.224	99	541.328	36	20219	0.282192	20219	8.83694
		546.26	40	541.816	36	20220	0.265869	20220	9.80872
		546.475	40	542.158	36	20221	0.28354	20221	10.0895
		546.482	60	542.194	36	20222	0.333402	20222	10.0117
		546.486	80	542.205	36	20223	0.364898	20223	9.53387
		546.493	60	542.273	36	20224	0.332556	20224	8.54886
		546.496	40	542.276	36	20225	0.253148	20225	7.63816
		546.507	40	542.283	36	20226	0.176528	20226	7.10753
		547.012	40	542.29	36	20227	0.12478	20227	6.47638
		547.216	40	542.301	36	20228	0.0959939	20228	5.75606
		547.22	40	542.319	72	20229	0.0787693	20229	5.49535
		547.227	40	542.49	36	20230	0.0634665	20230	5.81488
		547.23	40	543.196	36	20231	0.0580398	20231	6.78434
		547.234	60	543.236	36	20232	0.0719335	20232	8.4974
		547.237	60	543.264	36	20233	0.0978247	20233	9.93508
		547.717	40	543.278	36	20234	0.127426	20234	10.1497
		547.732	40	543.282	54	20235	0.171787	20235	10.5163
		547.825	40	543.289	36	20236	0.25207	20236	12.7099
		547.836	40	543.303	36	20237	0.365796	20237	15.5784
		547.846	60	543.336	36	20238	0.468267	20238	16.5891
		547.85	40	544.246	54	20239	0.516625	20239	15.2047
		548.237	40	544.26	36	20240	0.509647	20240	13.0759
		548.251	60	544.264	36	20241	0.478971	20241	11.7135
		548.693	40	544.267	36	20242	0.519185	20242	11.0739
		548.771	80	545.261	36	20243	0.795074	20243	10.2116
		548.918	40	545.268	36	20244	1.37688	20244	8.8208
		549.094	40	545.286	36	20245	2.16242	20245	7.2447
		549.101	40	545.411	36	20246	3.18016	20246	5.58831
		549.112	40	545.55	36	20247	4.55219	20247	4.07672
		549.266	40	546.191	36	20248	6.07668	20248	3.23287
		549.281	40	546.194	36	20249	7.23112	20249	3.15849
		549.446	40	546.205	36	20250	7.37691	20250	3.66581
		550.983	40	546.209	36	20251	6.67496	20251	5.14504
		551.263	60	546.244	36	20252	6.5195	20252	8.63588
		551.271	60	546.255	36	20253	7.57041	20253	14.3674
		551.803	40	546.259	36	20254	8.67112	20254	20.1504
		552.26	40	546.262	36	20255	8.75232	20255	23.4169
		553.282	40	546.266	36	20256	8.20469	20256	24.9781
		554.096	40	546.273	36	20257	8.17706	20257	27.2053
		554.273	40	546.28	36	20258	9.45947	20258	29.5809
		554.597	40	546.466	36	20259	11.5461	20259	29.9549
		555.297	40	546.477	54	20260	12.8976	20260	27.8824
		555.809	40	546.481	90	20261	12.4817	20261	24.5641
		556.264	40	546.484	54	20262	10.5171	20262	23.0281
		556.275	40	546.488	54	20263	8.04408	20263	27.9474
		556.279	40	546.491	90	20264	5.96898	20264	41.3649
		556.282	80	546.495	161	20265	4.35103	20265	58.6849
		556.333	40	546.499	36	20266	2.89998	20266	72.5876
		557.283	40	546.513	54	20267	1.70711	20267	81.127
		557.297	60	546.745	36	20268	0.996909	20268	87.2198
		557.438	40	547.197	36	20269	0.723832	20269	92.8809
		558.223	40	547.229	36	20270	0.696364	20270	98.9385
		558.259	40	547.236	36	20271	0.773962	20271	107.785
		558.266	80	547.243	36	20272	0.873495	20272	120.369
		558.288	60	547.25	54	20273	0.900935	20273	129.084
		558.299	40	547.258	72	20274	0.794215	20274	123.673
		558.31	40	547.265	36	20275	0.608122	20275	104.921
		558.332	40	547.268	36	20276	0.453197	20276	83.4349
		558.784	40	547.279	36	20277	0.380561	20277	66.8591
		559.273	99	547.308	36	20278	0.340596	20278	53.7432
		559.283	60	547.326	36	20279	0.285845	20279	40.9809
		559.758	40	547.498	54	20280	0.272553	20280	30.6295
		559.765	60	547.508	36	20281	0.379494	20281	25.6915
		560.211	40	547.512	36	20282	0.619373	20282	25.4738
		560.214	40	547.802	36	20283	0.967089	20283	27.0078
		560.222	60	547.834	36	20284	1.37459	20284	27.6664
		560.229	40	547.845	36	20285	1.71967	20285	25.9979
		560.24	40	548.232	36	20286	1.87401	20286	22.623
		560.794	40	548.236	54	20287	1.88175	20287	19.8566
		561.284	40	548.261	36	20288	1.9441	20288	19.0065
		561.291	80	548.275	36	20289	2.1398	20289	19.6413
		561.302	60	548.34	36	20290	2.25179	20290	20.2018
		561.32	40	549.768	36	20291	2.11489	20291	19.1128
		561.828	60	550.26	36	20292	1.8738	20292	17.1484
		561.839	40	551.248	36	20293	1.65438	20293	16.2553
		562.213	40	551.316	36	20294	1.46254	20294	16.2534
		562.224	40	552.186	36	20295	1.30814	20295	15.3238
		562.238	40	553.252	54	20296	1.13973	20296	12.9257
		562.253	40	553.28	36	20297	0.898711	20297	10.2802
		562.296	40	553.324	36	20298	0.616036	20298	8.22703
		562.322	40	553.349	36	20299	0.394891	20299	6.69586
		562.333	60	554.293	36	20300	0.320849	20300	5.59268
		562.761	40	554.304	36	20301	0.372684	20301	4.70855
		562.768	40	555.281	36	20302	0.455337	20302	3.76675
		564.066	40	555.288	54	20303	0.49423	20303	2.93198
		564.222	60	556.274	36	20304	0.463652	20304	2.63942
		564.229	40	556.277	54	20305	0.37286	20305	3.0283
		564.233	60	556.281	36	20306	0.27831	20306	3.80252
		564.24	60	556.288	36	20307	0.25261	20307	4.588
		565.219	40	556.313	36	20308	0.311225	20308	5.36474
		565.281	40	556.317	36	20309	0.408859	20309	6.53502
		565.306	40	556.339	36	20310	0.506795	20310	8.69031
		565.51	40	556.833	36	20311	0.604333	20311	12.2738
		566.282	40	557.05	36	20312	0.678074	20312	16.9107
		566.804	40	557.076	36	20313	0.665751	20313	21.1877
		567.277	40	557.238	36	20314	0.55479	20314	24.2939
		567.292	40	557.26	36	20315	0.406359	20315	27.6421
		567.321	40	557.282	36	20316	0.279143	20316	32.9842
		568.357	40	557.3	36	20317	0.187321	20317	39.4666
		569.164	40	557.307	36	20318	0.124257	20318	46.323
		569.281	40	558.258	36	20319	0.0858997	20319	56.8325
		569.679	60	558.265	36	20320	0.0728495	20320	71.4209
		569.701	40	558.269	36	20321	0.0868591	20321	80.1509
		570.242	40	558.276	72	20322	0.126294	20322	74.8886
		570.257	99	558.28	36	20323	0.187306	20323	62.1381
		570.279	40	558.283	36	20324	0.261861	20324	53.3237
		570.283	40	558.29	36	20325	0.308242	20325	51.7765
		570.294	60	558.305	36	20326	0.280824	20326	52.0368
		570.305	60	558.319	54	20327	0.225933	20327	48.1413
		570.63	40	558.323	72	20328	0.234689	20328	41.5055
		570.765	40	558.327	36	20329	0.309499	20329	36.6676
		570.784	40	558.334	36	20330	0.37122	20330	33.6832
		570.838	40	558.786	36	20331	0.362475	20331	29.5152
		570.97	40	559.282	36	20332	0.315547	20332	22.9792
		571.226	60	559.297	36	20333	0.327695	20333	16.4128
		571.245	60	559.325	36	20334	0.470852	20334	13.0218
		571.256	60	560.227	54	20335	0.742713	20335	13.337
		571.299	40	560.246	36	20336	1.15967	20336	15.3999
		571.805	40	560.26	54	20337	1.86392	20337	17.0651
		572.087	40	560.275	36	20338	2.78162	20338	16.9022
		572.237	40	560.749	36	20339	3.28621	20339	14.422
		572.248	40	560.793	36	20340	2.96226	20340	10.6053
		572.292	40	560.815	36	20341	2.26018	20341	7.09169
		572.306	99	561.286	36	20342	1.70948	20342	4.64659
		572.632	40	561.293	36	20343	1.36393	20343	3.11731
		573.299	80	561.301	36	20344	1.24009	20344	2.17434
		573.31	40	561.312	36	20345	1.43131	20345	1.60742
		573.34	40	561.624	36	20346	1.81353	20346	1.28755
		573.351	40	561.801	36	20347	2.19983	20347	1.1623
		574.264	40	561.819	36	20348	2.69718	20348	1.26219
		574.323	40	561.841	36	20349	3.37299	20349	1.60866
		575.016	40	561.856	36	20350	3.80883	20350	2.23488
		575.284	40	561.859	36	20351	3.57124	20351	3.21589
		575.292	40	562.226	54	20352	2.80062	20352	4.32639
		575.809	60	562.244	54	20353	2.04385	20353	5.0088
		576.236	40	562.291	36	20354	1.64279	20354	5.09499
		576.272	40	562.346	36	20355	1.44995	20355	4.86514
		576.298	60	562.353	54	20356	1.31558	20356	4.51194
		577.24	40	563.337	54	20357	1.38127	20357	4.29062
		577.287	60	563.341	36	20358	1.70889	20358	4.40403
		577.298	40	564.144	36	20359	2.08658	20359	4.42645
		578.274	40	564.239	36	20360	2.17181	20360	3.82846
		578.277	40	564.246	36	20361	1.85176	20361	2.86216
		578.307	40	564.254	36	20362	1.40179	20362	2.11097
		578.31	40	564.257	36	20363	1.09632	20363	1.74835
		578.749	40	564.264	36	20364	0.999523	20364	1.73056
		579.261	60	564.268	36	20365	1.09245	20365	2.04139
		579.275	60	564.272	108	20366	1.28835	20366	2.55179
		579.283	60	564.275	36	20367	1.40921	20367	3.09696
		579.29	40	564.279	179	20368	1.39456	20368	3.54444
		579.301	40	564.283	108	20369	1.4514	20369	3.62609
		580.245	40	564.286	72	20370	1.74193	20370	3.15852
		580.271	40	564.29	36	20371	2.17785	20371	2.36547
		580.636	40	564.294	54	20372	2.62078	20372	1.66712
		581.297	40	564.297	108	20373	3.05543	20373	1.26742
		581.533	40	565.123	36	20374	3.81886	20374	1.0743
		581.592	40	565.265	36	20375	5.66243	20375	1.00975
		581.843	40	565.269	36	20376	8.64659	20376	1.14934
		582.283	80	565.276	90	20377	11.0993	20377	1.54163
		582.331	40	565.28	54	20378	11.6821	20378	2.23018
		582.493	40	565.32	36	20379	11.3473	20379	3.38926
		582.837	40	566.248	36	20380	11.2175	20380	5.02648
		582.844	40	566.277	54	20381	11.3972	20381	6.5665
		583.059	40	566.317	36	20382	12.4309	20382	7.27419
		583.332	40	566.824	36	20383	14.9401	20383	7.13693
		583.34	40	567.283	36	20384	17.9596	20384	6.71357
		583.347	40	567.291	36	20385	19.7082	20385	6.1599
		584.331	40	568.276	36	20386	19.2652	20386	5.18663
		584.675	40	569.291	36	20387	16.551	20387	3.99221
		584.82	40	569.309	36	20388	12.7997	20388	3.27738
		584.827	40	569.36	36	20389	10.2092	20389	3.31834
		584.838	40	569.96	36	20390	9.57161	20390	3.75085
		584.842	40	569.996	36	20391	9.94675	20391	4.175
		585.312	40	570.223	36	20392	10.6155	20392	4.69916
		585.316	60	570.267	36	20393	11.516	20393	5.77376
		585.32	40	570.27	54	20394	12.0566	20394	7.53191
		585.323	40	570.31	36	20395	12.0053	20395	9.62312
		585.327	40	570.332	36	20396	12.444	20396	11.3215
		585.338	40	570.354	36	20397	13.548	20397	11.5676
		585.798	40	571.181	36	20398	14.3465	20398	10.0774
		585.805	40	571.214	36	20399	15.1734	20399	7.97698
		585.824	40	571.218	36	20400	17.1979	20400	6.32207
		586.05	40	571.225	36	20401	21.1605	20401	5.36102
		586.057	40	571.232	36	20402	27.652	20402	5.14344
		586.228	40	571.247	36	20403	35.1665	20403	5.5639
		586.32	60	571.269	36	20404	39.8251	20404	6.23031
		586.324	40	571.294	36	20405	39.3044	20405	6.60357
		586.339	40	572.298	36	20406	33.8813	20406	6.30489
		587.27	40	572.305	90	20407	26.1583	20407	5.62543
		587.329	40	572.309	36	20408	20.8909	20408	5.25245
		587.793	40	572.312	54	20409	21.5013	20409	5.15919
		587.808	40	572.323	36	20410	26.9332	20410	4.64594
		588.238	40	573.298	36	20411	32.8359	20411	3.59335
		588.25	40	573.309	36	20412	36.0912	20412	2.62682
		588.253	80	573.617	36	20413	36.1718	20413	2.09347
		588.257	40	574.284	54	20414	33.8019	20414	1.77857
		588.261	40	575.287	36	20415	31.2037	20415	1.45105
		588.264	40	575.301	36	20416	29.8153	20416	1.13302
		588.268	119	575.312	54	20417	28.9813	20417	0.934397
		588.272	80	575.327	36	20418	29.2428	20418	0.846429
		588.276	40	575.812	36	20419	31.7972	20419	0.789354
		588.313	40	575.819	54	20420	34.7776	20420	0.743918
		588.595	40	575.973	36	20421	35.8242	20421	0.685118
		588.784	40	576.234	54	20422	37.0924	20422	0.55473
		588.799	40	576.315	36	20423	44.2865	20423	0.385551
		588.822	40	576.319	36	20424	59.8162	20424	0.2757
		589.223	40	576.326	36	20425	75.7503	20425	0.252175
		589.238	40	576.33	36	20426	82.063	20426	0.274962
		589.256	40	576.797	36	20427	81.5707	20427	0.300004
		589.268	40	577.275	36	20428	83.7499	20428	0.291388
		589.275	40	577.29	36	20429	90.0386	20429	0.247594
		590.089	40	577.304	36	20430	95.3621	20430	0.212499
		590.093	40	577.308	36	20431	99.0402	20431	0.218083
		590.097	40	577.525	36	20432	104.578	20432	0.253276
		590.242	60	577.573	36	20433	113.529	20433	0.310445
		590.253	40	577.941	36	20434	126.476	20434	0.408703
		590.312	40	579.016	36	20435	139.573	20435	0.541271
		590.751	40	579.178	36	20436	144.913	20436	0.642432
		591.071	40	579.256	36	20437	144.05	20437	0.65065
		591.246	40	579.259	54	20438	143.999	20438	0.586583
		591.302	40	579.267	54	20439	140.409	20439	0.516748
		591.891	40	579.278	36	20440	126.219	20440	0.466584
		591.973	40	579.289	36	20441	108.052	20441	0.419918
		592.096	40	579.304	36	20442	98.9546	20442	0.361974
		592.107	40	579.669	36	20443	102.426	20443	0.292355
		593.005	40	579.798	36	20444	113.905	20444	0.2197
		593.057	60	580.384	36	20445	135.598	20445	0.15669
		593.087	40	580.756	36	20446	173.979	20446	0.113069
		593.288	40	581.269	36	20447	222.571	20447	0.0893452
		593.303	40	581.358	36	20448	262.828	20448	0.0817321
		594.225	40	581.783	36	20449	278.483	20449	0.0844932
		594.232	99	581.845	54	20450	263.244	20450	0.0842736
		594.24	40	582.233	36	20451	223.505	20451	0.0725673
		594.251	40	582.237	36	20452	176.555	20452	0.0612068
		594.255	40	582.27	90	20453	139.36	20453	0.0654722
		594.277	60	582.274	72	20454	115.193	20454	0.083637
		594.281	40	582.278	108	20455	95.9591	20455	0.101688
		594.355	40	582.281	144	20456	76.562	20456	0.107852
		595.248	40	582.285	197	20457	59.4178	20457	0.0997759
		595.255	60	582.289	126	20458	48.2753	20458	0.0825322
		595.259	40	582.292	197	20459	43.0378	20459	0.0677651
		595.266	80	582.296	179	20460	39.3721	20460	0.0719379
		595.274	40	582.3	144	20461	33.9625	20461	0.108101
		595.278	80	582.303	126	20462	28.0232	20462	0.177947
		595.281	139	582.307	126	20463	23.2429	20463	0.269864
		595.285	119	582.311	90	20464	19.6927	20464	0.3581
		595.289	80	582.315	90	20465	18.5476	20465	0.411657
		595.293	99	582.318	54	20466	22.1429	20466	0.432845
		595.296	219	582.322	36	20467	30.5431	20467	0.479874
		595.3	199	582.34	36	20468	39.2391	20468	0.611014
		595.304	99	582.344	36	20469	42.6241	20469	0.816027
		595.307	80	582.839	36	20470	40.335	20470	1.04534
		595.311	40	583.272	36	20471	36.9477	20471	1.23953
		595.315	60	583.276	36	20472	35.5708	20472	1.29581
		595.319	40	583.283	54	20473	35.8758	20473	1.15158
		595.326	80	583.287	72	20474	37.1199	20474	0.889251
		595.337	40	583.29	90	20475	38.1908	20475	0.632747
		595.487	40	583.298	90	20476	37.4157	20476	0.427016
		595.696	40	583.301	36	20477	35.3848	20477	0.279251
		595.704	60	583.305	54	20478	34.4407	20478	0.20323
		595.842	40	583.501	54	20479	35.2107	20479	0.193437
		595.89	60	584.1	36	20480	36.0166	20480	0.224559
		595.913	40	584.271	36	20481	36.0471	20481	0.279578
		596.088	40	584.289	36	20482	37.3599	20482	0.342637
		596.118	40	584.3	36	20483	40.8158	20483	0.38086
		596.264	40	584.811	36	20484	43.1646	20484	0.369678
		596.272	40	584.822	72	20485	41.9349	20485	0.318878
		596.275	40	584.83	54	20486	38.7589	20486	0.2651
		596.279	60	584.837	36	20487	37.8033	20487	0.247351
		596.283	60	585.237	54	20488	44.8609	20488	0.27344
		596.294	40	585.292	36	20489	64.1952	20489	0.318187
		596.298	40	585.322	36	20490	94.8923	20490	0.355065
		596.302	60	585.326	36	20491	135.486	20491	0.370748
		596.305	139	586.211	36	20492	195.339	20492	0.388807
		596.309	80	586.248	36	20493	293.018	20493	0.478089
		596.313	40	586.282	54	20494	422.315	20494	0.641742
		596.317	99	586.286	36	20495	527.415	20495	0.76677
		596.324	40	586.289	36	20496	559.272	20496	0.809744
		596.331	40	586.323	36	20497	536.774	20497	0.853564
		596.743	40	586.326	36	20498	495.972	20498	0.909291
		596.78	40	586.334	54	20499	432.695	20499	0.922401
		596.784	40	586.645	36	20500	341.985	20500	0.92785
		597.278	80	586.827	36	20501	252.833	20501	0.985673
		597.293	40	587.116	36	20502	191.2	20502	1.07369
		597.296	40	587.294	36	20503	149.48	20503	1.13408
		597.308	80	587.298	54	20504	111.485	20504	1.15818
		597.764	40	587.302	36	20505	77.9668	20505	1.15506
		597.783	40	587.313	54	20506	54.7559	20506	1.07733
		598.296	40	587.343	36	20507	41.1478	20507	0.906953
		598.303	40	587.576	36	20508	36.8886	20508	0.722266
		598.311	40	587.751	36	20509	42.8786	20509	0.593786
		598.322	40	588.274	108	20510	54.0735	20510	0.511761
		598.461	40	588.278	72	20511	61.7624	20511	0.428022
		599.053	40	588.282	72	20512	64.0449	20512	0.33563
		599.15	40	588.285	72	20513	66.8739	20513	0.272071
		599.233	40	588.289	54	20514	73.2471	20514	0.243957
		599.27	40	588.297	54	20515	79.4285	20515	0.228791
		599.278	40	588.304	72	20516	84.4248	20516	0.24578
		599.296	60	588.323	36	20517	93.2514	20517	0.348073
		599.308	60	588.791	36	20518	106.662	20518	0.566985
		599.315	40	588.835	36	20519	117.924	20519	0.921044
		599.42	40	588.965	36	20520	122.246	20520	1.40428
		599.817	40	589.24	36	20521	121.397	20521	1.90852
		599.922	40	589.266	36	20522	117.326	20522	2.294
		600.031	40	589.772	36	20523	109.484	20523	2.55413
		600.267	40	590.296	36	20524	99.7781	20524	2.74468
		600.279	60	590.307	36	20525	90.3132	20525	2.81508
		600.297	40	590.772	54	20526	79.036	20526	2.74868
		600.301	40	590.839	54	20527	63.9273	20527	2.71193
		600.316	80	591.32	36	20528	48.0798	20528	2.79335
		600.331	40	591.353	36	20529	37.8482	20529	2.83841
		600.346	40	591.863	54	20530	34.3674	20530	2.62658
		600.496	40	592.307	36	20531	32.4187	20531	2.11363
		600.646	40	592.966	36	20532	30.2495	20532	1.55033
		601.228	40	592.992	36	20533	30.2994	20533	1.19799
		601.299	40	593.302	72	20534	31.8663	20534	1.02212
		601.326	40	593.309	36	20535	32.235	20535	0.859703
		601.333	80	593.313	36	20536	29.9846	20536	0.661971
		601.363	40	593.634	36	20537	24.6544	20537	0.461167
		602.088	40	593.738	36	20538	17.7115	20538	0.291407
		602.302	40	594.085	36	20539	11.9861	20539	0.185761
		602.34	60	594.227	36	20540	8.69281	20540	0.150317
		602.407	40	594.235	36	20541	6.73669	20541	0.156839
		602.614	40	594.238	36	20542	4.9422	20542	0.179553
		602.64	40	594.242	36	20543	3.56755	20543	0.211074
		602.821	40	594.246	54	20544	3.26725	20544	0.248815
		602.967	80	594.249	36	20545	3.95545	20545	0.285745
		602.983	40	594.253	54	20546	5.02024	20546	0.30964
		602.986	40	594.283	36	20547	6.0678	20547	0.312449
		602.99	40	594.369	36	20548	7.07836	20548	0.301254
		603.024	40	595.243	54	20549	7.69894	20549	0.282734
		603.306	40	595.246	36	20550	7.55489	20550	0.24774
		603.313	40	595.25	54	20551	7.05435	20551	0.193913
		603.321	60	595.254	54	20552	6.78555	20552	0.14627
		603.336	60	595.258	54	20553	7.00508	20553	0.128876
		603.501	40	595.261	36	20554	7.32532	20554	0.140742
		603.863	40	595.265	54	20555	6.84205	20555	0.170744
		604.303	40	595.273	54	20556	5.58377	20556	0.219646
		604.314	40	595.284	144	20557	4.58085	20557	0.311695
		604.318	40	595.288	90	20558	4.46482	20558	0.462506
		604.322	80	595.291	90	20559	5.21291	20559	0.644915
		604.325	80	595.295	161	20560	6.92284	20560	0.852749
		604.728	40	595.299	108	20561	10.1684	20561	1.13867
		604.807	40	595.302	90	20562	15.0788	20562	1.43404
		604.822	40	595.306	126	20563	19.9287	20563	1.51116
		604.83	60	595.31	54	20564	21.5453	20564	1.33519
		604.837	40	595.317	126	20565	18.7704	20565	1.09345
		605.274	40	595.336	36	20566	14.2498	20566	0.853535
		605.293	60	595.347	36	20567	11.2759	20567	0.600449
		605.316	99	595.355	36	20568	10.8333	20568	0.40086
		605.331	60	595.818	36	20569	11.3416	20569	0.302161
		605.35	40	595.822	54	20570	10.736	20570	0.259838
		606.213	40	595.826	36	20571	8.97378	20571	0.214756
		606.262	40	595.968	36	20572	7.11222	20572	0.161976
		606.265	80	596.076	36	20573	5.56091	20573	0.126873
		606.269	119	596.14	36	20574	4.35965	20574	0.116937
		606.273	99	596.274	36	20575	3.51979	20575	0.119718
		606.277	60	596.282	54	20576	2.9633	20576	0.12196
		606.284	60	596.285	36	20577	2.6327	20577	0.124268
		606.288	40	596.293	72	20578	2.44595	20578	0.137107
		606.292	40	596.3	108	20579	2.23444	20579	0.157773
		606.296	60	596.304	54	20580	1.91091	20580	0.175201
		606.363	40	596.308	197	20581	1.59629	20581	0.200491
		607.257	40	596.311	36	20582	1.53661	20582	0.255914
		607.272	60	596.323	36	20583	1.95296	20583	0.343715
		607.344	40	596.338	36	20584	2.98703	20584	0.468777
		607.363	40	596.745	36	20585	4.50748	20585	0.652541
		607.812	40	596.753	36	20586	5.58417	20586	0.857803
		608.276	40	596.764	72	20587	5.19394	20587	0.981918
		608.288	60	596.771	36	20588	3.81504	20588	0.999362
		608.318	40	596.775	36	20589	2.69329	20589	0.963913
		608.333	60	596.786	54	20590	2.20769	20590	0.881092
		608.412	40	597.067	36	20591	2.10703	20591	0.749058
		608.537	40	597.25	36	20592	2.1095	20592	0.612638
		608.658	40	597.258	36	20593	1.94825	20593	0.493117
		608.752	40	597.261	36	20594	1.57961	20594	0.386806
		609.349	40	597.265	36	20595	1.22781	20595	0.318705
		609.614	40	597.276	36	20596	1.05017	20596	0.30669
		610.272	40	597.284	72	20597	1.02247	20597	0.325357
		610.279	40	597.306	72	20598	1.10285	20598	0.36227
		610.294	40	597.318	36	20599	1.31572	20599	0.441102
		610.328	40	597.321	36	20600	1.67528	20600	0.559803
		610.472	40	597.34	36	20601	2.07723	20601	0.696668
		610.555	40	597.785	36	20602	2.23376	20602	0.864075
		611.055	40	597.86	54	20603	1.93789	20603	1.03135
		611.066	40	597.984	36	20604	1.45951	20604	1.1504
		611.085	40	598.242	36	20605	1.23321	20605	1.40329
		611.305	40	598.261	36	20606	1.28949	20606	2.08688
		611.312	60	598.272	36	20607	1.4107	20607	3.08112
		611.32	40	598.28	36	20608	1.60221	20608	4.20341
		611.324	60	598.287	54	20609	1.91988	20609	5.98464
		611.327	119	598.298	36	20610	2.08541	20610	8.19671
		611.339	40	598.306	36	20611	1.92182	20611	8.86989
		611.346	40	598.31	54	20612	1.86459	20612	7.32504
		611.573	60	598.767	36	20613	2.4661	20613	5.34865
		611.592	40	598.774	36	20614	3.52318	20614	4.15947
		611.797	40	598.785	54	20615	4.33573	20615	3.55826
		611.823	40	599.28	36	20616	4.88964	20616	3.57662
		611.914	40	599.299	72	20617	5.98812	20617	4.46864
		612.115	40	599.321	36	20618	8.21422	20618	5.58542
		612.179	60	599.34	36	20619	10.7615	20619	6.01999
		612.357	40	599.831	36	20620	11.789	20620	6.04228
		612.418	40	600.244	36	20621	10.7797	20621	6.11984
		612.422	40	600.27	36	20622	8.93246	20622	5.94463
		612.831	40	600.274	36	20623	7.28803	20623	5.75053
		613.07	40	600.277	36	20624	6.12008	20624	6.09142
		613.244	40	600.281	126	20625	5.1869	20625	6.35719
		613.29	40	600.285	108	20626	4.28059	20626	5.76482
		613.316	60	600.289	90	20627	3.71619	20627	4.59479
		613.328	80	600.292	161	20628	3.71872	20628	3.53469
		613.332	60	600.296	377	20629	3.95075	20629	3.04831
		613.335	60	600.3	233	20630	3.98593	20630	3.19693
		613.343	60	600.304	359	20631	3.84259	20631	3.71569
		613.601	40	600.307	197	20632	3.95984	20632	4.30607
		613.756	40	600.311	215	20633	4.63485	20633	4.68424
		613.798	40	600.315	251	20634	5.69162	20634	4.76054
		613.802	40	600.319	54	20635	7.05059	20635	4.7063
		613.828	60	600.322	126	20636	9.41123	20636	4.59384
		613.836	40	600.326	36	20637	13.0152	20637	4.37398
		613.844	40	600.33	72	20638	15.3782	20638	4.11527
		613.847	40	600.334	36	20639	13.8484	20639	3.77795
		613.999	60	600.341	36	20640	9.94866	20640	3.14153
		614.162	40	600.379	36	20641	6.73524	20641	2.34122
		614.272	40	601.268	36	20642	4.8966	20642	1.88304
		614.276	40	601.283	90	20643	3.73494	20643	2.05378
		614.28	40	601.291	90	20644	2.80541	20644	2.66411
		614.287	40	601.294	90	20645	2.14089	20645	3.20699
		614.291	99	601.298	54	20646	2.01475	20646	3.34654
		614.295	40	601.302	72	20647	2.74298	20647	3.25039
		614.306	80	601.306	36	20648	4.41774	20648	3.37676
		614.31	40	601.309	108	20649	6.36522	20649	4.16025
		614.318	40	601.313	90	20650	7.36009	20650	5.44093
		614.322	60	601.317	54	20651	7.04934	20651	6.20426
		614.325	60	601.321	72	20652	6.29182	20652	5.92296
		614.329	60	601.324	54	20653	5.75778	20653	5.35624
		614.337	40	601.328	36	20654	5.48342	20654	5.25706
		614.834	40	601.332	54	20655	5.44269	20655	5.62503
		614.91	40	601.336	72	20656	5.4	20656	6.12992
		615.259	80	601.339	108	20657	4.92495	20657	6.52976
		615.271	40	601.347	36	20658	4.00866	20658	6.79467
		615.293	40	601.392	36	20659	3.03829	20659	6.70498
		615.297	40	601.396	54	20660	2.32484	20660	5.94843
		615.301	40	601.411	36	20661	1.98182	20661	4.91674
		615.305	40	602.109	36	20662	1.922	20662	4.5512
		615.309	60	602.293	54	20663	1.95621	20663	5.28321
		615.32	40	602.297	36	20664	1.99266	20664	6.58274
		615.537	40	602.327	54	20665	1.96313	20665	7.70781
		615.715	60	602.331	36	20666	1.78463	20666	8.52432
		615.909	40	602.339	36	20667	1.49913	20667	9.05674
		615.916	60	602.782	36	20668	1.20181	20668	9.13892
		615.92	40	602.85	36	20669	0.934307	20669	9.16267
		615.989	40	603.301	36	20670	0.712137	20670	10.0463
		616.11	40	603.312	36	20671	0.553741	20671	12.1257
		616.266	40	603.316	36	20672	0.50057	20672	14.8814
		616.3	40	603.323	72	20673	0.583395	20673	17.2211
		616.304	60	603.327	54	20674	0.729314	20674	17.6887
		616.308	60	603.342	36	20675	0.794777	20675	15.9856
		616.319	40	604.211	36	20676	0.779333	20676	13.6361
		616.323	40	604.275	36	20677	0.807709	20677	12.082
		616.331	40	604.305	36	20678	0.907767	20678	11.6925
		616.334	40	604.317	54	20679	1.08107	20679	12.8581
		616.806	80	604.324	72	20680	1.41813	20680	16.7246
		616.813	40	604.328	54	20681	1.98235	20681	23.3679
		617.236	40	604.332	72	20682	2.71181	20682	29.8825
		617.312	40	604.343	36	20683	3.45339	20683	33.231
		617.316	80	604.347	36	20684	4.07939	20684	33.9086
		617.323	60	604.829	54	20685	4.62975	20685	34.8193
		617.335	40	605.265	36	20686	5.47189	20686	39.7903
		617.7	40	605.311	72	20687	6.97272	20687	51.4877
		617.711	40	605.329	54	20688	8.72591	20688	65.6167
		617.78	40	605.341	36	20689	10.0886	20689	73.9111
		617.803	40	606.332	36	20690	10.9638	20690	74.0735
		617.81	40	607.256	36	20691	10.7961	20691	69.9861
		617.825	40	607.267	36	20692	8.98448	20692	68.0554
		617.848	40	607.275	36	20693	6.3344	20693	71.7096
		617.867	60	607.279	72	20694	3.92572	20694	74.2234
		617.898	40	607.282	54	20695	2.15199	20695	67.2887
		617.909	40	607.286	72	20696	1.18162	20696	54.3298
		618.309	40	607.29	36	20697	0.889338	20697	43.3469
		618.332	40	607.294	72	20698	0.866299	20698	35.5613
		618.343	60	607.297	36	20699	0.829625	20699	29.8181
		618.556	60	607.313	36	20700	0.768478	20700	27.9664
		618.827	40	607.633	36	20701	0.742907	20701	29.7947
		618.968	40	607.788	36	20702	0.714933	20702	30.4588
		619.322	60	607.943	36	20703	0.631863	20703	28.3987
		619.329	60	608.26	36	20704	0.520183	20704	28.2597
		619.337	80	608.267	54	20705	0.436172	20705	31.9338
		619.341	80	608.294	36	20706	0.404242	20706	34.816
		619.345	119	608.305	36	20707	0.425304	20707	33.6456
		619.349	159	608.317	36	20708	0.509092	20708	31.2353
		619.352	60	608.324	54	20709	0.676763	20709	31.0044
		619.356	80	608.815	36	20710	0.932797	20710	32.5258
		619.36	40	609.269	36	20711	1.24051	20711	33.9281
		619.364	80	609.276	54	20712	1.50496	20712	34.4453
		619.368	40	609.318	36	20713	1.68898	20713	34.4819
		619.691	40	609.325	36	20714	1.92748	20714	36.6883
		619.825	80	609.495	36	20715	2.38791	20715	45.4966
		619.833	40	609.616	36	20716	3.26488	20716	61.5568
		619.836	60	609.801	36	20717	4.67342	20717	80.8734
		619.84	40	610.244	36	20718	6.1272	20718	100.86
		619.844	40	610.301	36	20719	6.97332	20719	121.178
		619.848	60	610.501	36	20720	7.43855	20720	141.045
		619.852	80	610.849	36	20721	8.40167	20721	160.069
		619.855	60	611.315	36	20722	10.3547	20722	178.625
		619.859	60	611.322	54	20723	12.8161	20723	192.199
		619.863	40	611.326	54	20724	15.1376	20724	191.574
		619.874	40	611.33	36	20725	17.2898	20725	176.467
		619.882	40	611.334	54	20726	19.0275	20726	158.012
		620.317	40	611.341	54	20727	19.3627	20727	144.543
		620.332	40	611.576	36	20728	17.53	20728	134.996
		620.343	80	611.807	36	20729	14.3717	20729	128.124
		620.347	40	611.818	36	20730	11.432	20730	128.455
		620.351	40	611.83	36	20731	9.03378	20731	136.601
		620.355	40	612.28	36	20732	7.12847	20732	144.807
		620.374	40	612.303	36	20733	5.97888	20733	144.959
		620.511	40	612.322	36	20734	5.18534	20734	132.305
		620.874	40	612.345	36	20735	4.20688	20735	106.978
		621.08	40	613.194	36	20736	3.29577	20736	77.435
		621.11	40	613.243	54	20737	2.80585	20737	55.0569
		621.267	40	613.258	36	20738	2.55223	20738	43.6618
		621.289	40	613.277	54	20739	2.20615	20739	38.682
		621.297	40	613.326	54	20740	1.67852	20740	34.7528
		621.301	60	613.33	36	20741	1.15823	20741	31.7003
		621.305	40	613.372	36	20742	0.931169	20742	33.7487
		621.312	80	613.854	36	20743	1.06739	20743	43.9212
		621.316	40	613.865	36	20744	1.35787	20744	58.8304
		621.324	80	614.29	36	20745	1.54716	20745	69.6876
		621.496	40	614.317	36	20746	1.52185	20746	71.037
		621.503	60	614.328	54	20747	1.32865	20747	65.8476
		621.511	80	614.343	72	20748	1.12412	20748	59.7581
		621.515	80	614.347	54	20749	1.0249	20749	53.2093
		621.522	60	614.533	54	20750	0.968966	20750	42.8723
		621.538	40	614.643	36	20751	0.850421	20751	29.8472
		621.671	40	614.73	36	20752	0.702877	20752	20.0204
		621.702	40	615.239	36	20753	0.631781	20753	17.5594
		621.728	40	615.281	36	20754	0.681257	20754	22.8093
		621.9	40	615.292	36	20755	0.816905	20755	32.938
		621.915	60	615.304	36	20756	0.931839	20756	42.1574
		622.049	40	615.311	36	20757	0.913408	20757	44.8961
		622.106	40	615.319	54	20758	0.775394	20758	40.246
		622.294	40	615.566	36	20759	0.615229	20759	31.7354
		622.313	40	616.276	54	20760	0.490274	20760	23.4088
		622.381	40	616.28	54	20761	0.412852	20761	17.3382
		622.576	40	616.284	36	20762	0.373726	20762	13.5606
		622.909	40	616.288	36	20763	0.379533	20763	11.0773
		622.981	40	616.291	72	20764	0.458908	20764	9.25845
		622.993	40	616.295	36	20765	0.588059	20765	8.30249
		623.077	40	616.299	36	20766	0.708459	20766	8.33546
		623.233	40	616.303	36	20767	0.824673	20767	8.71093
		623.318	40	616.307	36	20768	0.981721	20768	8.70348
		623.34	40	616.314	54	20769	1.15908	20769	8.70836
		623.639	60	616.318	54	20770	1.23727	20770	9.41051
		623.642	40	616.554	36	20771	1.13455	20771	10.2632
		623.654	40	616.782	72	20772	0.972211	20772	10.5916
		623.765	40	616.797	36	20773	0.996179	20773	10.9806
		623.86	40	616.805	54	20774	1.32202	20774	12.2374
		623.876	40	616.995	36	20775	1.81453	20775	13.776
		624.094	40	617.257	54	20776	2.31329	20776	13.9167
		624.147	40	617.299	36	20777	2.82941	20777	12.4125
		624.304	40	617.303	36	20778	3.24755	20778	10.9543
		624.327	80	617.31	36	20779	3.2076	20779	10.4157
		624.488	40	617.314	36	20780	2.68655	20780	10.0245
		624.541	40	617.333	72	20781	2.18929	20781	8.88701
		624.652	60	617.466	36	20782	2.08193	20782	7.27686
		624.687	60	617.474	36	20783	2.2783	20783	6.69356
		625.246	40	617.478	36	20784	2.58695	20784	8.21434
		625.36	40	617.546	36	20785	2.84584	20785	11.1617
		625.46	40	617.634	54	20786	2.83851	20786	13.8094
		626.165	40	617.641	36	20787	2.47125	20787	15.2948
		626.199	40	617.645	36	20788	1.91496	20788	15.9825
		626.218	40	617.657	54	20789	1.46157	20789	15.8492
		626.329	40	617.801	54	20790	1.3525	20790	14.4671
		626.349	40	617.809	36	20791	1.6573	20791	12.5101
		626.368	40	617.82	36	20792	2.23256	20792	11.4654
		626.387	40	617.95	36	20793	2.74552	20793	11.9127
		626.395	40	618.254	36	20794	2.89662	20794	12.8662
		626.602	40	618.281	36	20795	2.87894	20795	13.1654
		626.628	40	618.307	36	20796	3.13611	20796	13.4608
		626.854	40	618.327	54	20797	3.51251	20797	15.4899
		627.284	40	618.395	36	20798	3.53126	20798	19.8526
		627.318	60	618.669	54	20799	3.25617	20799	26.4591
		627.836	40	618.753	36	20800	2.93672	20800	34.5993
		628.028	40	618.806	54	20801	2.48374	20801	41.7743
		628.3	60	619.294	72	20802	1.87316	20802	45.3537
		628.312	60	619.317	36	20803	1.35761	20803	44.6989
		628.316	60	619.324	54	20804	1.09518	20804	42.0197
		628.592	40	619.328	36	20805	1.0183	20805	40.8386
		628.796	40	619.332	36	20806	1.11676	20806	42.0728
		629.099	40	619.336	54	20807	1.5741	20807	42.7982
		629.264	40	619.34	90	20808	2.48239	20808	39.756
		629.295	40	619.343	36	20809	3.53103	20809	34.7607
		629.302	99	619.347	54	20810	4.28247	20810	32.5861
		629.318	40	619.351	108	20811	4.77326	20811	32.7035
		629.322	40	619.355	144	20812	5.61246	20812	31.3539
		629.341	40	619.359	54	20813	7.55924	20813	28.8077
		629.349	40	619.362	36	20814	10.4281	20814	26.4894
		629.483	40	619.37	36	20815	12.8092	20815	23.0192
		629.51	40	619.378	36	20816	14.1548	20816	17.9019
		629.644	40	619.382	36	20817	14.7738	20817	13.3694
		629.671	40	619.484	36	20818	13.7857	20818	11.1291
		629.71	40	619.827	54	20819	10.9819	20819	11.1363
		630.298	40	619.835	36	20820	8.30093	20820	12.941
		630.313	60	619.843	108	20821	6.80108	20821	16.5607
		630.332	40	619.846	54	20822	5.6203	20822	22.4163
		630.351	40	619.85	161	20823	4.42042	20823	30.4558
		630.363	40	619.854	54	20824	3.7964	20824	40.5944
		630.367	40	619.858	54	20825	3.76678	20825	52.4582
		630.371	80	619.862	90	20826	3.79249	20826	63.121
		631.274	40	619.866	72	20827	3.58255	20827	69.8642
		631.286	40	620.331	54	20828	3.1786	20828	73.7232
		631.313	60	620.334	54	20829	2.7991	20829	76.3077
		631.321	40	620.338	36	20830	2.76995	20830	76.2278
		631.921	40	620.342	54	20831	3.27579	20831	69.9013
		631.94	40	620.365	36	20832	4.07785	20832	57.4962
		631.986	40	621.254	36	20833	4.88851	20833	45.3334
		632.002	40	621.342	36	20834	5.70861	20834	38.5643
		632.063	40	621.345	36	20835	6.11937	20835	36.5271
		632.148	40	621.361	36	20836	5.37483	20836	35.4037
		632.225	40	621.716	36	20837	3.76488	20837	32.3444
		632.26	80	622.185	36	20838	2.40859	20838	28.0338
		632.279	60	622.502	36	20839	1.80617	20839	25.7346
		632.283	80	622.98	36	20840	1.66823	20840	27.1606
		632.294	60	623.332	54	20841	1.65015	20841	29.4413
		632.306	40	623.335	54	20842	1.65927	20842	28.2803
		632.333	60	623.339	36	20843	1.65383	20843	23.0162
		632.352	60	623.347	36	20844	1.57381	20844	16.3178
		632.356	40	623.656	36	20845	1.48293	20845	10.8673
		632.36	60	624.02	36	20846	1.45959	20846	7.59322
		632.483	40	624.261	36	20847	1.53493	20847	6.08988
		632.514	80	624.299	36	20848	1.76019	20848	5.78608
		632.517	40	624.337	36	20849	2.08188	20849	6.25475
		632.675	40	624.819	36	20850	2.41442	20850	7.00304
		632.683	40	625.068	36	20851	2.94128	20851	7.73357
		632.698	40	625.248	36	20852	4.00755	20852	8.50201
		632.714	40	625.263	36	20853	5.61428	20853	9.35634
		632.718	40	625.271	36	20854	7.30169	20854	10.0796
		632.722	60	625.29	36	20855	8.40628	20855	10.2663
		632.733	60	625.298	36	20856	8.40553	20856	9.87187
		632.818	40	625.317	36	20857	7.61146	20857	9.52584
		632.868	40	625.321	36	20858	6.99199	20858	9.86812
		632.91	40	625.363	36	20859	7.00294	20859	10.8467
		632.933	40	625.677	36	20860	7.40036	20860	11.5212
		632.983	60	625.88	36	20861	7.97317	20861	10.7895
		633.037	40	625.903	36	20862	8.86365	20862	8.73155
		633.126	40	626.248	54	20863	9.91957	20863	6.34672
		633.184	40	626.252	36	20864	9.98859	20864	4.34914
		633.261	60	626.282	54	20865	8.16541	20865	3.04689
		633.269	40	626.29	36	20866	5.45438	20866	2.51072
		633.276	60	626.351	54	20867	3.41857	20867	2.68561
		633.292	60	626.359	36	20868	2.33252	20868	3.63233
		633.296	60	626.386	36	20869	1.79946	20869	5.19937
		633.299	60	627.156	54	20870	1.53792	20870	6.57263
		633.303	80	627.29	54	20871	1.32167	20871	6.88996
		633.311	40	627.306	54	20872	1.07916	20872	6.18742
		633.315	119	627.386	36	20873	0.913274	20873	5.1991
		633.322	60	627.39	36	20874	0.874442	20874	4.57982
		633.326	40	627.938	36	20875	0.902708	20875	4.50279
		633.33	60	628.057	36	20876	0.950721	20876	4.60448
		633.346	40	628.242	36	20877	1.04143	20877	4.53945
		633.349	40	628.268	36	20878	1.18732	20878	4.49373
		633.357	40	628.284	54	20879	1.34416	20879	4.56929
		633.407	40	628.315	54	20880	1.45609	20880	4.46682
		633.542	40	628.33	36	20881	1.5005	20881	4.20335
		633.812	40	628.349	36	20882	1.53759	20882	4.16346
		633.835	40	628.472	36	20883	1.59459	20883	4.49107
		633.928	40	628.48	36	20884	1.55067	20884	4.86946
		634.294	40	628.744	36	20885	1.35484	20885	4.82179
		634.302	60	628.798	36	20886	1.13265	20886	4.27853
		634.305	40	628.875	36	20887	0.974695	20887	3.56681
		634.329	40	629.029	36	20888	0.861863	20888	2.92804
		634.791	40	629.036	36	20889	0.76412	20889	2.45501
		635.069	40	629.244	36	20890	0.684363	20890	2.08881
		635.293	40	629.282	36	20891	0.670138	20891	1.64509
		635.324	40	629.309	54	20892	0.80766	20892	1.16834
		635.864	40	629.313	36	20893	1.13287	20893	0.881149
		636.022	40	629.32	36	20894	1.54647	20894	0.837039
		636.216	40	629.328	36	20895	1.92049	20895	0.955302
		636.324	40	629.336	36	20896	2.24295	20896	1.1526
		636.339	40	629.347	36	20897	2.58453	20897	1.40609
		636.358	40	629.497	36	20898	3.00024	20898	1.82221
		636.837	40	630.296	36	20899	3.39606	20899	2.52856
		637.031	40	630.316	36	20900	3.5954	20900	3.53562
		637.328	40	630.327	36	20901	3.42404	20901	4.69611
		637.332	40	630.339	36	20902	2.75837	20902	5.93606
		637.34	60	630.342	36	20903	1.99512	20903	7.65547
		637.355	40	630.358	36	20904	1.8636	20904	10.4307
		637.378	40	630.366	36	20905	2.4593	20905	14.2057
		637.402	40	630.369	54	20906	3.22456	20906	17.84
		637.533	40	630.389	36	20907	3.91435	20907	20.0209
		637.552	40	630.681	36	20908	4.95224	20908	21.0981
		637.657	40	631.069	36	20909	6.58628	20909	22.0484
		637.804	40	631.281	36	20910	8.4293	20910	21.6502
		638.245	40	631.365	54	20911	10.3529	20911	18.4551
		638.283	40	631.816	36	20912	12.6348	20912	14.0807
		638.295	40	632.066	36	20913	14.261	20913	10.7019
		638.334	40	632.181	36	20914	13.4595	20914	8.25437
		638.523	40	632.185	36	20915	10.6819	20915	6.16719
		638.686	40	632.254	36	20916	8.11677	20916	4.8299
		638.744	60	632.281	54	20917	6.94227	20917	4.64192
		638.825	40	632.285	36	20918	6.7982	20918	5.42895
		639.189	40	632.289	90	20919	6.65193	20919	6.72079
		639.305	40	632.297	72	20920	5.8256	20920	8.01955
		639.313	60	632.301	72	20921	4.56044	20921	9.49612
		639.32	40	632.316	36	20922	3.39048	20922	12.0783
		639.347	40	632.324	54	20923	2.49067	20923	16.0265
		639.378	40	632.335	36	20924	1.86477	20924	20.2766
		639.382	60	632.347	36	20925	1.52384	20925	23.6781
		639.634	40	632.358	72	20926	1.37185	20926	25.8028
		639.677	40	632.443	54	20927	1.3117	20927	26.5067
		639.812	40	632.462	36	20928	1.45831	20928	26.1509
		640.316	40	632.79	72	20929	1.90142	20929	25.998
		640.331	40	632.878	36	20930	2.4265	20930	27.0782
		640.389	40	632.959	36	20931	2.81546	20931	29.6597
		640.548	40	632.967	36	20932	3.10993	20932	33.6517
		640.796	40	633.244	36	20933	3.38366	20933	37.3854
		640.843	40	633.252	36	20934	3.59034	20934	38.0007
		640.897	40	633.283	54	20935	3.7139	20935	35.0603
		640.924	40	633.294	108	20936	3.80582	20936	30.4076
		641.005	40	633.298	54	20937	3.89868	20937	25.1685
		641.176	40	633.314	54	20938	4.09674	20938	20.6443
		641.18	40	633.317	54	20939	4.59432	20939	17.9607
		641.25	40	633.321	54	20940	5.33685	20940	15.5804
		641.261	60	633.325	36	20941	5.7623	20941	12.1754
		641.269	40	633.352	36	20942	5.37166	20942	9.06281
		641.319	40	634.269	36	20943	4.3845	20943	7.39555
		641.323	40	634.304	36	20944	3.28391	20944	6.93666
		641.35	40	634.308	36	20945	2.31844	20945	6.94648
		641.362	40	634.331	36	20946	1.63759	20946	6.55549
		641.366	80	634.339	36	20947	1.2959	20947	5.46524
		641.37	80	634.786	36	20948	1.22284	20948	4.20334
		641.374	40	634.894	36	20949	1.30306	20949	3.36486
		641.478	40	635.265	36	20950	1.39059	20950	3.01903
		641.521	40	635.303	36	20951	1.39376	20951	2.98233
		641.808	40	635.311	54	20952	1.33987	20952	3.35876
		641.816	60	635.369	36	20953	1.30173	20953	4.43504
		641.835	40	636.172	36	20954	1.31087	20954	5.97195
		641.87	60	636.307	36	20955	1.30602	20955	7.01383
		641.882	40	636.404	36	20956	1.2899	20956	7.18443
		641.897	60	636.562	36	20957	1.49803	20957	7.40362
		641.986	60	636.635	36	20958	2.13829	20958	8.41271
		642.146	60	636.848	36	20959	3.2187	20959	10.4076
		642.2	40	637.033	36	20960	4.72721	20960	13.6475
		642.34	40	637.35	36	20961	6.51628	20961	17.4838
		642.406	40	637.408	72	20962	8.21965	20962	21.0576
		642.409	40	637.512	36	20963	9.71554	20963	24.4827
		642.607	40	637.594	36	20964	11.6291	20964	27.209
		642.631	40	638.081	36	20965	14.6279	20965	27.8482
		642.786	40	638.104	36	20966	17.665	20966	25.745
		642.926	40	638.236	36	20967	18.8993	20967	21.3895
		643.128	40	638.297	36	20968	18.1397	20968	16.1452
		643.178	40	638.34	36	20969	16.238	20969	11.2523
		643.228	60	638.375	36	20970	13.7985	20970	7.34575
		643.256	60	638.468	36	20971	11.059	20971	4.9061
		643.263	40	638.781	36	20972	8.12558	20972	3.94292
		643.306	40	638.924	36	20973	5.54273	20973	3.69212
		643.314	40	639.029	36	20974	3.99788	20974	3.38523
		643.326	40	639.23	36	20975	3.49556	20975	2.8859
		643.329	40	639.381	36	20976	3.45839	20976	2.35953
		643.333	40	639.826	36	20977	3.5573	20977	1.88789
		643.345	40	640.066	54	20978	3.98438	20978	1.52964
		643.349	40	640.322	54	20979	4.85427	20979	1.28485
		643.504	40	640.361	36	20980	5.80395	20980	1.05718
		643.621	40	640.388	36	20981	6.5269	20981	0.802885
		643.764	40	640.597	36	20982	7.40589	20982	0.580605
		643.916	40	640.768	36	20983	8.92825	20983	0.456753
		644.27	40	640.911	36	20984	11.082	20984	0.437921
		644.32	40	641.268	54	20985	13.6357	20985	0.496405
		644.339	80	641.287	36	20986	15.9922	20986	0.621683
		644.351	60	641.291	36	20987	17.3685	20987	0.810694
		644.386	40	641.341	36	20988	17.658	20988	1.02993
		644.81	80	641.349	54	20989	17.3498	20989	1.19208
		644.818	40	641.357	54	20990	16.7018	20990	1.18848
		644.821	40	641.369	54	20991	15.5388	20991	1.04761
		644.833	40	641.396	36	20992	14.0729	20992	0.961151
		644.864	40	641.632	36	20993	13.4228	20993	1.04332
		645.273	40	641.846	36	20994	14.9811	20994	1.21881
		645.28	60	641.888	36	20995	19.3859	20995	1.39021
		645.3	40	642.09	54	20996	24.8191	20996	1.58432
		645.304	40	642.23	36	20997	27.1529	20997	1.83225
		645.327	60	642.323	54	20998	24.4857	20998	1.98096
		645.331	40	642.377	90	20999	19.125	20999	1.87744
		645.416	40	642.839	36	21000	14.0996	21000	1.70204
		645.448	40	642.847	36	21001	10.8677	21001	1.80461
		645.607	40	643.235	36	21002	9.4905	21002	2.2733
		645.634	40	643.247	54	21003	9.45631	21003	2.84133
		645.735	40	643.254	36	21004	10.7094	21004	3.24688
		645.794	40	643.262	36	21005	12.8755	21005	3.60414
		645.817	40	643.274	36	21006	14.2533	21006	4.15496
		645.829	40	643.278	36	21007	14.0536	21007	4.76218
		645.848	40	643.282	72	21008	13.7302	21008	5.15027
		645.856	60	643.32	36	21009	14.0344	21009	5.58615
		645.86	60	643.328	54	21010	13.5895	21010	6.28595
		646.101	40	643.464	36	21011	11.8005	21011	6.78661
		646.132	60	643.818	36	21012	10.4189	21012	7.30062
		646.214	40	643.849	36	21013	10.7928	21013	8.61001
		646.257	60	643.86	36	21014	12.1431	21014	9.96868
		646.3	40	643.919	36	21015	13.6261	21015	10.1947
		646.304	40	643.934	36	21016	15.3492	21016	9.93739
		646.319	40	644	36	21017	16.4269	21017	9.89774
		646.327	60	644.272	36	21018	15.5105	21018	9.17807
		646.362	40	644.311	36	21019	13.5234	21019	7.37198
		646.845	40	644.319	36	21020	11.9663	21020	5.5187
		647.004	40	644.334	36	21021	10.5161	21021	4.47746
		647.071	60	644.482	36	21022	9.01068	21022	4.27599
		647.16	40	644.653	54	21023	8.29557	21023	4.58463
		647.238	60	644.82	72	21024	8.21228	21024	4.76255
		647.25	40	644.828	54	21025	7.69565	21025	4.17602
		647.254	40	644.84	54	21026	6.52738	21026	3.0519
		647.258	40	645.252	36	21027	5.33324	21027	2.11906
		647.261	40	645.264	54	21028	4.82142	21028	1.63815
		647.265	60	645.295	36	21029	5.70487	21029	1.53435
		647.273	40	645.299	90	21030	8.58938	21030	1.74717
		647.277	40	645.302	36	21031	13.8471	21031	2.15352
		647.281	40	645.318	72	21032	20.8073	21032	2.57535
		647.359	40	645.322	54	21033	26.583	21033	2.90191
		647.655	40	645.326	36	21034	28.6224	21034	3.02208
		647.854	40	645.334	36	21035	27.7255	21035	2.89301
		648.255	40	645.345	36	21036	26.0837	21036	2.97491
		648.329	40	645.388	36	21037	24.9679	21037	3.94581
		648.372	60	645.547	36	21038	24.8319	21038	5.665
		648.384	40	645.816	36	21039	26.1017	21039	7.58529
		648.434	40	645.831	36	21040	28.5469	21040	9.90388
		649.074	40	645.863	36	21041	29.9818	21041	12.1074
		649.086	40	645.874	54	21042	27.9846	21042	12.0533
		649.117	40	646.022	36	21043	23.1079	21043	9.25872
		649.218	40	646.279	36	21044	18.1646	21044	5.97465
		649.394	40	646.298	36	21045	14.1388	21045	3.74953
		649.55	60	646.302	36	21046	10.1026	21046	2.40026
		649.698	40	646.306	36	21047	6.28009	21047	1.62952
		649.921	40	646.31	36	21048	3.83631	21048	1.45901
		650.003	40	646.314	54	21049	3.09694	21049	1.84773
		650.034	40	646.322	54	21050	3.43569	21050	2.41729
		650.151	40	646.337	36	21051	4.15818	21051	2.6907
		650.307	40	646.353	54	21052	5.13534	21052	2.65338
		650.327	60	646.365	36	21053	6.45436	21053	2.59898
		650.334	40	646.808	54	21054	7.81924	21054	2.65301
		650.37	40	646.832	36	21055	8.85718	21055	2.75385
		650.452	40	646.882	36	21056	9.28457	21056	2.88371
		650.545	40	646.964	36	21057	8.57874	21057	3.24743
		650.752	40	647.163	36	21058	6.75727	21058	4.0633
		650.815	40	647.186	36	21059	5.02703	21059	5.33933
		650.838	40	647.268	90	21060	4.67504	21060	7.02511
		650.991	40	647.272	36	21061	6.00591	21061	8.86074
		651.088	40	647.28	36	21062	8.32694	21062	10.4198
		651.284	60	647.303	36	21063	10.377	21063	11.7734
		651.295	40	647.708	36	21064	11.2385	21064	12.8501
		651.303	40	647.973	36	21065	10.9157	21065	12.618
		651.307	60	648.184	36	21066	9.70492	21066	10.4802
		651.311	40	648.293	36	21067	8.11726	21067	7.35006
		651.319	40	648.32	36	21068	7.2406	21068	4.68062
		651.323	80	648.359	54	21069	7.44123	21069	3.1292
		651.346	40	648.601	36	21070	7.81973	21070	2.3527
		651.362	40	648.827	36	21071	7.85026	21071	1.85894
		651.69	40	648.831	36	21072	7.8141	21072	1.49265
		651.823	40	648.847	36	21073	7.87831	21073	1.26136
		651.87	40	648.858	36	21074	8.08942	21074	1.20234
		652.132	40	649.116	36	21075	8.5208	21075	1.34245
		652.335	40	649.123	36	21076	9.25597	21076	1.62694
		652.405	40	649.256	36	21077	10.4149	21077	1.88531
		652.546	40	649.311	36	21078	11.6421	21078	2.00413
		652.66	40	649.318	36	21079	12.4465	21079	2.13454
		652.746	40	649.326	36	21080	13.3379	21080	2.54685
		652.754	40	649.428	36	21081	15.0609	21081	3.2392
		652.906	40	649.631	36	21082	17.285	21082	3.70752
		652.914	40	649.72	36	21083	19.8003	21083	3.5076
		653.09	40	650.025	36	21084	23.23	21084	3.05781
		653.278	40	650.81	54	21085	26.5151	21085	3.15327
		653.321	40	651.275	36	21086	27.0602	21086	3.96273
		653.376	40	651.286	36	21087	24.8493	21087	5.0848
		653.399	40	651.294	36	21088	21.7483	21088	6.14109
		653.423	60	651.302	72	21089	18.8772	21089	6.86588
		653.838	40	651.31	54	21090	17.8745	21090	7.07488
		654.276	40	651.314	36	21091	19.7869	21091	7.12096
		654.28	60	651.318	72	21092	23.2305	21092	8.13836
		654.323	40	651.329	54	21093	26.3435	21093	11.1458
		654.354	60	651.337	54	21094	28.35	21094	15.7262
		654.468	40	651.579	36	21095	29.7769	21095	20.7845
		654.723	40	651.888	36	21096	31.8331	21096	26.1405
		654.75	40	652.303	36	21097	35.064	21097	30.4034
		654.813	40	652.314	54	21098	40.1479	21098	30.0723
		654.828	40	652.338	54	21099	47.9224	21099	24.5822
		654.836	60	652.349	36	21100	54.7874	21100	17.4625
		654.868	40	652.353	36	21101	53.977	21101	11.5914
		654.895	40	652.486	36	21102	45.5555	21102	7.59549
		654.919	40	652.529	36	21103	36.3886	21103	5.26546
		654.954	40	652.686	36	21104	30.7856	21104	4.36401
		655.009	40	652.76	36	21105	28.3942	21105	4.56779
		655.122	60	653.167	36	21106	26.8982	21106	5.17273
		655.126	40	653.586	36	21107	24.2352	21107	5.58687
		655.193	40	653.848	36	21108	20.6635	21108	5.86177
		655.314	40	653.977	36	21109	17.7348	21109	6.06036
		655.322	40	654.052	36	21110	15.5651	21110	5.81342
		655.326	40	654.361	36	21111	13.0387	21111	5.02034
		655.346	40	654.396	36	21112	9.81846	21112	4.19832
		655.373	40	654.811	36	21113	6.86304	21113	3.77997
		655.389	60	654.929	36	21114	5.32193	21114	3.65347
		655.397	40	655.266	36	21115	5.13772	21115	3.58554
		655.408	60	655.278	36	21116	4.98261	21116	3.44979
		655.84	40	655.34	36	21117	4.1421	21117	3.06876
		656.051	40	655.356	36	21118	3.25353	21118	2.52865
		656.334	40	655.376	54	21119	2.8418	21119	2.31368
		656.365	40	655.388	36	21120	2.94638	21120	2.66556
		656.369	40	655.399	36	21121	3.57926	21121	3.36748
		656.526	40	655.411	36	21122	4.49743	21122	4.12002
		656.816	40	655.772	54	21123	5.44439	21123	4.73604
		657.201	40	655.866	36	21124	6.59589	21124	5.23898
		657.33	40	655.889	36	21125	7.83019	21125	5.69787
		657.338	40	655.893	36	21126	8.28033	21126	6.37908
		657.342	40	655.987	36	21127	7.67843	21127	8.63923
		657.393	60	656.246	36	21128	6.95518	21128	14.463
		657.495	40	656.293	36	21129	6.99126	21129	23.2205
		657.531	40	656.332	54	21130	7.6296	21130	29.6655
		657.782	40	656.399	36	21131	7.87	21131	28.613
		657.849	40	656.642	36	21132	7.17793	21132	21.8757
		657.856	40	656.686	36	21133	6.20817	21133	16.6617
		658.253	40	656.999	36	21134	5.77568	21134	17.2367
		658.308	60	657.011	36	21135	5.86655	21135	21.5736
		658.312	40	657.145	36	21136	5.86468	21136	25.281
		658.32	40	657.341	36	21137	5.54781	21137	26.0867
		658.324	119	657.372	36	21138	5.33951	21138	24.2341
		658.336	40	657.569	36	21139	5.55318	21139	21.1756
		658.34	40	657.573	36	21140	6.12945	21140	18.5058
		658.344	40	657.596	36	21141	6.55584	21141	16.4761
		658.351	40	657.706	54	21142	6.12464	21142	14.4279
		658.355	40	657.981	36	21143	5.08552	21143	12.176
		658.359	60	658.311	36	21144	4.47999	21144	9.82705
		658.363	60	658.327	36	21145	4.7821	21145	7.72601
		658.367	40	658.33	36	21146	6.0544	21146	6.51772
		658.371	40	658.338	36	21147	8.37773	21147	6.34724
		658.375	80	658.342	72	21148	10.7215	21148	6.5985
		658.379	60	658.354	36	21149	11.3727	21149	6.5014
		658.383	40	658.358	36	21150	10.4196	21150	5.84508
		658.509	40	658.366	36	21151	9.87273	21151	5.02062
		658.516	60	658.37	108	21152	11.4883	21152	4.46532
		658.52	40	658.389	36	21153	14.8516	21153	4.34981
		658.524	60	658.393	36	21154	17.5052	21154	4.44806
		658.528	40	658.81	36	21155	17.9438	21155	4.57039
		658.54	40	658.853	36	21156	17.2385	21156	4.9905
		658.662	40	658.873	36	21157	16.9271	21157	5.7174
		658.705	40	658.892	36	21158	17.3782	21158	6.24897
		658.721	40	659.077	36	21159	18.1614	21159	6.4366
		658.725	40	659.27	36	21160	18.6375	21160	6.46019
		658.729	99	659.285	54	21161	18.5719	21161	6.3283
		658.732	40	659.289	36	21162	17.7946	21162	6.17498
		658.748	40	659.293	36	21163	15.8614	21163	6.06287
		658.874	40	659.301	36	21164	13.4001	21164	5.7253
		658.913	40	659.305	36	21165	12.0071	21165	5.37423
		658.917	60	659.325	54	21166	12.6114	21166	5.56659
		658.921	60	659.329	54	21167	15.5304	21167	6.25141
		658.937	40	659.333	36	21168	20.5823	21168	6.93814
		659.098	40	659.34	36	21169	25.8886	21169	7.15544
		659.133	60	659.348	36	21170	28.2905	21170	6.63133
		659.232	40	659.356	36	21171	26.1972	21171	5.5705
		659.271	40	659.364	36	21172	21.2202	21172	4.61892
		659.275	60	659.368	54	21173	16.5917	21173	4.33852
		659.298	40	659.372	54	21174	14.4972	21174	4.62626
		659.31	40	659.38	36	21175	14.4144	21175	4.95606
		659.322	40	659.553	36	21176	13.9407	21176	5.30224
		659.334	60	659.663	36	21177	11.9622	21177	6.19779
		659.369	40	659.679	36	21178	9.4669	21178	7.72529
		659.373	40	659.702	36	21179	7.17715	21179	8.88828
		659.381	40	659.86	36	21180	5.08138	21180	8.54069
		659.436	40	659.863	36	21181	3.43324	21181	7.00844
		659.566	40	659.891	36	21182	2.42803	21182	5.67682
		659.692	40	660.288	54	21183	1.8722	21183	5.14569
		659.727	40	660.292	36	21184	1.59326	21184	5.13332
		659.758	40	660.304	54	21185	1.64377	21185	5.51204
		659.786	40	660.308	36	21186	2.13906	21186	6.32606
		659.912	40	660.324	36	21187	3.16881	21187	7.62508
		659.932	40	660.328	36	21188	4.70556	21188	10.0284
		659.943	40	660.332	54	21189	6.45171	21189	13.7579
		660.002	40	660.335	36	21190	8.09303	21190	16.9976
		660.274	40	660.513	36	21191	9.65521	21191	18.1769
		660.278	40	660.575	36	21192	11.3592	21192	19.1292
		660.282	40	660.623	54	21193	13.6558	21193	23.5973
		660.286	60	660.635	36	21194	17.3087	21194	33.159
		660.29	40	660.674	36	21195	21.9765	21195	44.5413
		660.341	40	660.784	36	21196	25.5333	21196	51.6493
		660.368	40	660.827	36	21197	26.5512	21197	52.2293
		660.526	40	660.839	36	21198	25.3255	21198	50.3068
		660.553	40	660.859	36	21199	22.3458	21199	50.1236
		660.577	40	660.867	36	21200	18.281	21200	51.036
		660.813	40	660.875	54	21201	14.1974	21201	49.3435
		660.829	60	660.879	54	21202	10.7246	21202	43.178
		660.856	80	660.902	36	21203	7.83219	21203	34.4445
		660.86	99	660.969	36	21204	5.45707	21204	25.8732
		660.864	40	661.26	72	21205	3.82028	21205	18.8596
		660.868	40	661.264	54	21206	3.03832	21206	13.7951
		660.872	80	661.268	54	21207	3.02248	21207	10.0392
		660.896	40	661.272	36	21208	3.64187	21208	6.9552
		661.254	60	661.276	54	21209	4.48964	21209	4.69469
		661.269	60	661.28	72	21210	4.98173	21210	3.22221
		661.281	99	661.288	36	21211	5.1603	21211	2.32464
		661.289	40	661.292	54	21212	5.63265	21212	2.12721
		661.293	40	661.304	36	21213	6.32538	21213	2.66504
		661.317	40	661.308	54	21214	6.47611	21214	3.60387
		661.329	40	661.319	54	21215	6.14431	21215	4.50791
		661.352	40	661.327	54	21216	6.21385	21216	5.11461
		661.356	60	661.331	36	21217	7.16145	21217	5.43859
		661.368	60	661.335	72	21218	8.95587	21218	5.75701
		661.376	40	661.343	36	21219	11.1063	21219	6.37573
		661.628	40	661.351	36	21220	12.9128	21220	7.21532
		661.636	40	661.371	36	21221	14.5073	21221	7.92321
		661.647	40	661.375	54	21222	16.8615	21222	8.61434
		661.667	40	661.378	36	21223	20.8919	21223	9.71317
		661.722	40	661.382	36	21224	26.0963	21224	11.1438
		661.746	40	661.41	36	21225	29.8402	21225	12.4216
		661.829	40	661.674	36	21226	29.7006	21226	13.2004
		661.844	40	661.847	36	21227	26.4971	21227	13.8954
		661.872	60	661.855	36	21228	23.9528	21228	14.8592
		661.876	40	661.89	36	21229	25.3628	21229	14.6459
		661.888	60	661.914	36	21230	32.0276	21230	12.1992
		661.923	40	661.969	36	21231	44.378	21231	9.14079
		662.097	40	662.009	54	21232	59.8104	21232	7.08107
		662.152	40	662.064	36	21233	72.1761	21233	5.95526
		662.164	40	662.068	36	21234	79.2211	21234	5.25405
		662.215	40	662.115	36	21235	82.1374	21235	4.6291
		662.258	40	662.273	36	21236	76.9027	21236	4.00854
		662.494	40	662.28	36	21237	60.3119	21237	3.55833
		662.522	40	662.292	90	21238	40.2167	21238	3.41251
		662.613	60	662.3	36	21239	26.6134	21239	3.41411
		662.66	40	662.363	36	21240	20.0522	21240	3.1724
		662.68	40	662.505	36	21241	16.4873	21241	2.7035
		662.845	40	662.509	54	21242	14.7207	21242	2.41864
		662.9	40	662.552	36	21243	14.659	21243	2.3895
		662.912	40	662.931	36	21244	14.9983	21244	2.43053
		662.916	40	663.002	36	21245	15.4286	21245	2.50573
		663.232	40	663.077	36	21246	16.9378	21246	2.60777
		663.267	40	663.25	36	21247	19.0064	21247	2.6653
		663.295	60	663.27	54	21248	19.9277	21248	2.70689
		663.299	119	663.286	36	21249	19.6355	21249	2.85576
		663.303	119	663.297	108	21250	19.7204	21250	3.12751
		663.307	40	663.301	36	21251	21.1186	21251	3.34279
		663.31	60	663.317	90	21252	22.7198	21252	3.30295
		663.318	40	663.321	36	21253	23.1206	21253	3.19966
		663.346	40	663.325	36	21254	23.1792	21254	3.6059
		663.429	40	663.404	36	21255	24.7846	21255	4.69395
		663.575	40	663.416	36	21256	27.9917	21256	5.72847
		663.583	40	663.921	54	21257	30.4373	21257	5.93588
		663.63	40	664.09	54	21258	30.6517	21258	5.78571
		663.709	40	664.169	36	21259	31.1285	21259	6.6066
		663.886	40	664.209	36	21260	33.9459	21260	9.05486
		663.918	40	664.295	36	21261	35.7205	21261	12.3126
		664.289	40	664.323	36	21262	33.0078	21262	14.617
		664.301	40	664.327	36	21263	28.1375	21263	15.1314
		664.308	40	664.351	54	21264	24.8101	21264	14.9844
		664.316	40	664.422	36	21265	23.6676	21265	15.8588
		664.395	40	664.607	36	21266	23.1568	21266	18.5458
		664.403	40	664.69	36	21267	22.1884	21267	23.1893
		664.435	40	664.733	54	21268	21.2961	21268	30.8413
		664.66	40	664.816	36	21269	20.6318	21269	43.6077
		664.81	40	664.84	36	21270	19.583	21270	60.007
		664.818	60	665.211	36	21271	18.136	21271	72.4954
		664.826	40	665.247	36	21272	17.3126	21272	76.2133
		664.928	40	665.251	90	21273	18.5895	21273	75.3617
		665.031	40	665.259	36	21274	21.4814	21274	75.49
		665.074	40	665.263	36	21275	22.9847	21275	77.5415
		665.114	40	665.27	54	21276	21.1741	21276	78.8785
		665.126	40	665.274	72	21277	17.0995	21277	75.861
		665.149	40	665.278	36	21278	12.6814	21278	69.9423
		665.232	60	665.282	72	21279	8.87834	21279	66.5739
		665.236	80	665.286	72	21280	5.89319	21280	66.7169
		665.24	40	665.29	54	21281	3.84633	21281	67.0463
		665.256	40	665.294	108	21282	2.7636	21282	64.9901
		665.268	60	665.306	36	21283	2.46901	21283	60.2239
		665.272	60	665.314	36	21284	2.82968	21284	55.0169
		665.28	119	665.318	36	21285	3.84623	21285	51.6109
		665.284	119	665.326	36	21286	5.50258	21286	48.3228
		665.287	80	665.353	54	21287	7.65756	21287	41.9752
		665.291	80	665.357	36	21288	10.3449	21288	33.2941
		665.295	40	665.397	36	21289	14.0546	21289	25.7627
		665.299	40	665.405	72	21290	18.1015	21290	20.7891
		665.307	40	665.409	54	21291	19.1945	21291	17.6489
		665.323	40	665.413	36	21292	15.7559	21292	15.9897
		665.335	60	665.417	36	21293	11.2094	21293	16.0824
		665.339	40	665.421	36	21294	8.5938	21294	17.575
		665.343	60	665.468	36	21295	6.99389	21295	18.7062
		665.351	40	665.76	36	21296	5.22804	21296	18.7295
		665.394	80	665.974	36	21297	3.93979	21297	20.1199
		665.402	80	666.001	36	21298	3.59324	21298	23.8259
		665.406	139	666.005	54	21299	3.65537	21299	25.2884
		665.41	40	666.143	36	21300	3.77499	21300	21.4748
		665.414	40	666.151	36	21301	4.1848	21301	16.3101
		665.418	40	666.211	36	21302	4.97619	21302	13.8888
		665.422	60	666.258	36	21303	5.69415	21303	14.1833
		665.43	40	666.266	36	21304	5.91406	21304	16.563
		665.434	60	666.286	36	21305	5.66302	21305	20.9653
		665.611	40	666.29	36	21306	5.13941	21306	25.7265
		665.667	40	666.294	36	21307	4.43155	21307	27.3091
		665.833	40	666.309	36	21308	3.59226	21308	24.5889
		665.84	40	666.313	36	21309	2.81772	21309	21.1372
		666.038	40	666.317	54	21310	2.22633	21310	19.6947
		666.081	40	666.329	54	21311	1.76165	21311	18.5886
		666.236	40	666.337	36	21312	1.50335	21312	15.7878
		666.24	40	666.341	36	21313	1.6087	21313	11.8115
		666.255	40	666.408	54	21314	2.02118	21314	8.08349
		666.259	40	666.416	36	21315	2.41169	21315	5.44023
		666.267	60	666.424	36	21316	2.55399	21316	4.08817
		666.271	40	666.665	36	21317	2.69627	21317	3.69085
		666.279	40	666.981	36	21318	3.00408	21318	3.53745
		666.283	40	667.278	36	21319	3.15347	21319	3.15639
		666.291	40	667.29	36	21320	3.0846	21320	2.81085
		666.295	40	667.353	36	21321	3.22986	21321	2.9409
		666.33	40	667.405	36	21322	3.64648	21322	3.47751
		666.338	60	667.697	36	21323	3.84703	21323	4.0531
		666.406	40	667.824	36	21324	3.6886	21324	4.40749
		666.421	40	667.852	36	21325	3.5889	21325	4.40196
		666.481	40	667.86	36	21326	3.78054	21326	3.90904
		666.583	40	667.864	36	21327	4.1458	21327	3.05944
		666.682	40	667.871	36	21328	4.67044	21328	2.40706
		666.753	40	667.887	36	21329	5.62094	21329	2.42565
		666.995	40	667.935	36	21330	7.5031	21330	3.14273
		666.998	40	668.18	36	21331	10.7117	21331	4.16979
		667.303	40	668.283	36	21332	15.0648	21332	4.69066
		667.307	40	668.295	108	21333	19.5932	21333	4.2686
		667.331	40	668.299	36	21334	22.4935	21334	3.67548
		667.335	40	668.315	36	21335	22.4964	21335	3.73103
		667.339	40	668.323	36	21336	20.7776	21336	4.21912
		667.343	40	668.327	36	21337	19.816	21337	4.80794
		667.347	40	668.33	54	21338	20.3288	21338	5.60789
		667.465	40	668.358	54	21339	21.0073	21339	6.55354
		667.501	40	668.362	108	21340	20.3905	21340	7.39741
		667.722	40	668.366	72	21341	17.6834	21341	7.89144
		667.857	60	668.37	54	21342	13.8965	21342	7.81572
		667.861	40	668.378	72	21343	11.1673	21343	7.67377
		667.869	60	668.382	90	21344	9.56994	21344	8.73231
		667.873	60	668.386	54	21345	7.9236	21345	11.9474
		667.877	40	668.422	36	21346	6.30571	21346	16.3835
		667.892	60	668.469	36	21347	5.29626	21347	18.6304
		667.96	40	668.588	36	21348	4.87838	21348	16.4085
		667.968	40	668.655	36	21349	4.72062	21349	11.9541
		667.976	40	668.659	36	21350	4.69878	21350	9.07234
		668.165	40	668.857	36	21351	4.82671	21351	9.34454
		668.181	40	668.877	36	21352	4.97943	21352	12.2937
		668.245	40	668.897	36	21353	5.03908	21353	16.4356
		668.288	60	668.944	36	21354	4.9748	21354	19.8543
		668.292	40	669	36	21355	4.72152	21355	21.0086
		668.324	40	669.146	36	21356	4.21822	21356	19.6905
		668.336	40	669.285	54	21357	3.51447	21357	17.3617
		668.34	40	669.312	54	21358	2.77154	21358	15.3416
		668.351	40	669.316	108	21359	2.25863	21359	13.1232
		668.359	40	669.32	161	21360	2.18567	21360	10.1763
		668.371	60	669.324	161	21361	2.36593	21361	7.50669
		668.375	40	669.328	108	21362	2.35333	21362	5.89467
		668.387	40	669.332	126	21363	2.03456	21363	4.88495
		668.514	40	669.336	36	21364	1.67617	21364	4.07113
		668.53	40	669.34	126	21365	1.44878	21365	3.64161
		668.589	40	669.344	54	21366	1.32592	21366	3.70647
		668.72	40	669.348	54	21367	1.2402	21367	4.09408
		668.807	40	669.451	36	21368	1.16626	21368	4.69297
		668.858	60	669.503	36	21369	1.13667	21369	5.41703
		668.874	40	669.558	36	21370	1.13542	21370	5.8497
		668.886	60	669.617	36	21371	1.07423	21371	5.46104
		669.286	40	669.681	36	21372	0.933474	21372	4.55401
		669.322	40	669.705	36	21373	0.819388	21373	4.11749
		669.333	40	669.784	36	21374	0.82875	21374	4.48804
		669.349	80	669.831	36	21375	0.946636	21375	5.47386
		669.753	40	669.855	36	21376	1.0889	21376	7.28958
		669.849	60	669.859	54	21377	1.16895	21377	9.94315
		669.852	60	669.867	54	21378	1.23023	21378	12.1948
		669.86	99	669.871	108	21379	1.45867	21379	12.4651
		669.864	60	669.875	36	21380	1.90627	21380	11.0419
		669.868	40	669.883	90	21381	2.40678	21381	9.98017
		669.872	60	669.891	36	21382	2.76327	21382	10.4208
		669.876	40	669.899	36	21383	2.85311	21383	11.6153
		669.892	60	670.148	54	21384	2.83316	21384	12.7835
		669.896	60	670.279	36	21385	3.13828	21385	13.9711
		669.9	40	670.307	36	21386	3.96304	21386	14.8261
		669.92	40	670.311	36	21387	5.09779	21387	14.8805
		669.999	60	670.319	54	21388	6.17121	21388	14.7679
		670.32	40	670.323	72	21389	6.99643	21389	14.9731
		670.356	60	670.327	54	21390	7.96003	21390	14.9555
		670.384	40	670.339	36	21391	9.27958	21391	14.4114
		670.391	40	670.343	36	21392	10.351	21392	13.2923
		670.506	40	670.355	36	21393	10.7025	21393	11.6998
		670.582	40	670.366	36	21394	10.4398	21394	10.2651
		670.828	40	670.37	36	21395	10.1374	21395	9.05546
		670.875	40	670.374	36	21396	10.9842	21396	7.88711
		670.879	40	670.378	54	21397	14.1628	21397	7.5926
		671.018	40	670.39	36	21398	20.402	21398	8.89446
		671.097	40	670.394	90	21399	29.4285	21399	11.3739
		671.288	40	670.477	36	21400	38.1303	21400	14.5913
		671.311	40	670.87	36	21401	41.9187	21401	18.2015
		671.319	40	670.878	36	21402	39.2694	21402	20.2414
		671.327	40	670.894	36	21403	32.5375	21403	18.5563
		671.335	40	670.937	36	21404	24.9821	21404	13.9601
		671.343	40	671.033	36	21405	17.9143	21405	9.10152
		671.367	40	671.124	36	21406	11.7178	21406	5.71671
		671.375	40	671.167	36	21407	7.8943	21407	4.04206
		671.379	40	671.195	36	21408	6.99764	21408	3.58976
		671.53	40	671.302	36	21409	7.45287	21409	4.03072
		671.68	40	671.318	36	21410	7.75088	21410	5.15319
		671.843	40	671.322	36	21411	7.76229	21411	6.4253
		671.867	40	671.33	36	21412	7.70759	21412	7.14644
		671.883	40	671.338	54	21413	7.14955	21413	6.92573
		671.887	40	671.342	36	21414	5.86056	21414	5.9892
		672.323	60	671.35	54	21415	4.54772	21415	5.04201
		672.331	40	671.354	36	21416	3.97098	21416	4.65435
		672.335	60	671.786	36	21417	4.16168	21417	4.75857
		672.343	40	671.921	36	21418	4.57875	21418	4.81128
		672.347	40	671.961	36	21419	4.641	21419	4.40731
		672.363	40	672.33	36	21420	4.19416	21420	3.66638
		672.367	60	672.346	36	21421	3.48704	21421	2.94838
		672.371	99	672.354	36	21422	2.7803	21422	2.38322
		672.379	40	672.358	36	21423	2.16847	21423	2.02167
		672.581	40	672.37	54	21424	1.7263	21424	2.13196
		672.661	40	672.378	36	21425	1.59094	21425	2.80344
		672.701	40	672.386	36	21426	1.81446	21426	3.54068
		672.756	60	672.39	36	21427	2.33678	21427	3.74696
		672.816	40	672.414	36	21428	3.23112	21428	3.4226
		673.34	40	672.652	36	21429	4.73712	21429	3.09902
		673.364	40	672.687	36	21430	6.81047	21430	3.13181
		673.368	60	672.811	36	21431	8.93376	21431	3.33983
		673.372	40	672.882	36	21432	10.6973	21432	3.6761
		673.416	40	672.934	36	21433	11.8516	21433	4.72703
		673.435	40	672.969	36	21434	11.776	21434	6.70797
		673.749	40	673.037	36	21435	10.4476	21435	8.50233
		674.043	40	673.124	36	21436	9.601	21436	8.90387
		674.055	40	673.263	36	21437	10.7815	21437	8.22688
		674.135	40	673.331	36	21438	12.5046	21438	7.48547
		674.155	40	673.347	72	21439	12.2588	21439	7.10522
		674.27	40	673.371	36	21440	10.4556	21440	7.27327
		674.302	40	673.454	36	21441	9.17078	21441	7.91826
		674.326	40	673.458	36	21442	8.99992	21442	8.12688
		674.338	60	673.728	36	21443	9.10582	21443	7.39412
		674.342	40	673.744	36	21444	8.86386	21444	6.84218
		674.346	40	673.816	36	21445	8.50131	21445	8.04932
		674.465	60	674.034	36	21446	8.34717	21446	11.5271
		674.564	40	674.042	36	21447	8.17101	21447	15.7697
		674.58	40	674.11	54	21448	7.49876	21448	17.7859
		674.66	40	674.138	36	21449	6.52334	21449	16.369
		674.707	40	674.158	36	21450	6.02168	21450	13.4214
		674.763	40	674.348	54	21451	6.2396	21451	10.757
		674.835	40	674.356	36	21452	6.80319	21452	8.33554
		674.839	40	674.376	36	21453	7.66833	21453	5.95582
		674.867	40	674.555	36	21454	9.45534	21454	4.06087
		675.073	40	674.567	36	21455	11.9875	21455	3.01561
		675.093	60	674.655	36	21456	13.8241	21456	2.78595
		675.248	40	674.734	36	21457	14.7025	21457	3.0278
		675.324	60	674.949	54	21458	16.034	21458	3.35748
		675.328	60	675.12	36	21459	18.5237	21459	3.58845
		675.551	40	675.148	36	21460	20.5713	21460	3.63984
		675.591	60	675.251	36	21461	19.6677	21461	3.47438
		675.646	40	675.275	36	21462	15.8506	21462	3.16228
		675.694	40	675.347	36	21463	11.7369	21463	2.86246
		675.798	40	675.351	36	21464	9.31087	21464	2.69744
		675.877	40	675.355	54	21465	8.41003	21465	2.69722
		675.949	40	675.514	36	21466	7.74814	21466	2.84757
		675.953	60	675.577	36	21467	7.00747	21467	3.10539
		675.985	60	675.597	54	21468	7.1117	21468	3.42925
		676.14	40	675.613	36	21469	8.06989	21469	3.72586
		676.271	40	675.669	36	21470	8.61599	21470	3.80249
		676.323	40	675.689	36	21471	8.58805	21471	3.5897
		676.331	40	675.701	36	21472	9.15335	21472	3.22024
		676.335	40	675.757	36	21473	10.3669	21473	2.83834
		676.339	80	675.768	36	21474	11.0147	21474	2.51263
		676.343	40	675.936	36	21475	10.5105	21475	2.2011
		676.857	40	675.948	36	21476	9.21157	21476	1.83085
		676.92	40	675.967	36	21477	7.71728	21477	1.45973
		676.928	60	676.035	54	21478	6.62658	21478	1.2189
		676.94	40	676.059	36	21479	6.31406	21479	1.18104
		677.012	40	676.067	36	21480	6.644	21480	1.33303
		677.319	40	676.091	36	21481	6.94401	21481	1.59194
		677.343	60	676.214	36	21482	6.42993	21482	1.83848
		677.355	60	676.258	54	21483	5.16589	21483	1.95892
		677.371	40	676.262	36	21484	4.0714	21484	1.94406
		677.454	40	676.346	36	21485	3.53864	21485	1.9115
		677.729	40	676.386	36	21486	3.12649	21486	1.93215
		677.777	40	676.605	36	21487	2.53545	21487	1.94612
		677.849	40	676.987	36	21488	1.94373	21488	1.84121
		677.984	60	677.09	36	21489	1.64197	21489	1.58832
		678.008	40	677.218	36	21490	1.71005	21490	1.30438
		678.016	60	677.322	36	21491	1.90701	21491	1.08161
		678.236	40	677.342	36	21492	1.89231	21492	0.933352
		678.315	40	677.365	36	21493	1.62629	21493	0.928225
		678.319	60	677.947	36	21494	1.32309	21494	1.1417
		678.327	40	678.139	36	21495	1.11883	21495	1.57947
		678.339	40	678.226	36	21496	1.08461	21496	2.21055
		678.487	40	678.314	72	21497	1.31966	21497	2.94941
		678.503	40	678.334	72	21498	1.84863	21498	3.60728
		678.535	40	678.342	36	21499	2.51984	21499	3.96096
		678.702	40	678.346	36	21500	3.038	21500	3.94909
		678.758	40	678.426	36	21501	3.21297	21501	3.63289
		678.83	40	678.434	36	21502	3.16705	21502	3.06571
		678.858	40	678.517	36	21503	3.23548	21503	2.43517
		679.201	40	678.637	36	21504	3.57728	21504	1.95688
		679.297	40	678.681	36	21505	3.89445	21505	1.67419
		679.305	40	678.709	36	21506	3.83844	21506	1.66446
		679.333	40	678.805	36	21507	3.49017	21507	1.99483
		679.348	40	678.865	36	21508	3.25687	21508	2.42449
		679.36	40	678.896	36	21509	3.53204	21509	2.70589
		679.444	40	679.016	36	21510	4.33033	21510	2.89694
		679.468	40	679.036	36	21511	5.21211	21511	3.07022
		679.504	60	679.104	54	21512	5.65519	21512	3.22813
		679.596	40	679.208	36	21513	5.63772	21513	3.46607
		679.632	40	679.275	36	21514	5.72571	21514	3.97489
		679.656	40	679.287	36	21515	5.99721	21515	4.90606
		679.66	40	679.319	36	21516	5.62821	21516	6.17174
		679.676	60	679.343	36	21517	4.40284	21517	7.61068
		679.684	40	679.351	54	21518	3.15068	21518	8.94454
		679.823	60	679.359	36	21519	2.35246	21519	9.58953
		679.943	40	679.515	36	21520	1.82787	21520	9.45283
		680.135	40	679.942	36	21521	1.40157	21521	8.89827
		680.331	40	680.13	36	21522	1.05206	21522	7.8516
		680.438	40	680.221	36	21523	0.784955	21523	6.39312
		680.822	60	680.249	36	21524	0.609307	21524	5.16228
		680.898	40	680.305	36	21525	0.551123	21525	4.60129
		680.93	40	680.365	36	21526	0.610269	21526	4.7337
		680.998	40	680.433	36	21527	0.754213	21527	5.39654
		681.01	40	680.521	36	21528	0.950182	21528	6.27801
		681.042	40	680.645	36	21529	1.0972	21529	7.19047
		681.189	40	680.717	54	21530	1.04318	21530	8.21302
		681.321	60	680.749	54	21531	0.809529	21531	9.21679
		681.329	40	680.813	36	21532	0.632106	21532	9.86742
		681.353	60	680.837	36	21533	0.751499	21533	10.0624
		681.361	60	680.952	36	21534	1.34269	21534	10.0102
		681.365	40	681.028	36	21535	2.49117	21535	10.2353
		681.369	40	681.068	36	21536	4.01072	21536	11.1832
		681.397	40	681.264	36	21537	5.54138	21537	12.7164
		681.509	40	681.32	36	21538	6.69694	21538	13.9844
		681.825	40	681.344	36	21539	6.92477	21539	13.8024
		681.861	40	681.364	36	21540	6.00597	21540	12.0289
		682.281	40	681.52	36	21541	4.57625	21541	9.83752
		682.341	40	681.536	36	21542	3.42886	21542	8.26991
		682.369	40	681.544	36	21543	2.85093	21543	7.64364
		682.393	40	681.556	36	21544	2.93274	21544	7.84563
		682.413	40	681.58	54	21545	3.81721	21545	8.66928
		682.517	40	681.632	36	21546	5.28413	21546	10.0543
		682.741	40	681.636	36	21547	6.67444	21547	11.8103
		682.829	40	681.752	36	21548	7.6923	21548	13.2411
		682.889	40	681.756	54	21549	8.67943	21549	13.8071
		683.105	40	681.764	36	21550	9.7949	21550	13.8573
		683.189	40	681.788	36	21551	10.6645	21551	13.7556
		683.249	40	681.8	36	21552	11.0022	21552	13.5136
		683.269	40	681.844	36	21553	11.0811	21553	13.4809
		683.297	40	681.848	36	21554	11.6906	21554	13.7138
		683.321	40	681.86	36	21555	13.1985	21555	13.4964
		683.333	60	682.331	36	21556	14.3585	21556	12.2222
		683.353	40	682.335	36	21557	13.4126	21557	10.0927
		683.365	40	682.355	36	21558	10.5587	21558	8.2681
		683.373	60	682.363	36	21559	7.78948	21559	7.92574
		683.377	99	682.375	36	21560	6.35665	21560	8.81634
		683.533	40	682.447	36	21561	5.97257	21561	9.45566
		683.605	40	682.587	36	21562	6.09247	21562	8.88758
		683.637	40	682.695	36	21563	6.29986	21563	7.59914
		683.745	40	682.735	36	21564	6.08606	21564	6.44407
		683.753	40	682.835	36	21565	5.37961	21565	5.56524
		683.833	40	682.847	36	21566	4.73731	21566	4.84098
		683.845	40	682.888	36	21567	4.69841	21567	4.84792
		683.885	40	683.028	36	21568	5.39411	21568	6.63883
		684.001	40	683.1	36	21569	6.93366	21569	10.4671
		684.13	40	683.132	36	21570	9.57172	21570	15.5113
		684.166	40	683.328	54	21571	12.8027	21571	21.0296
		684.266	40	683.336	54	21572	14.7941	21572	27.5205
		684.298	40	683.344	36	21573	13.9477	21573	34.822
		684.318	40	683.352	36	21574	11.0545	21574	38.5613
		684.35	40	683.356	36	21575	8.96766	21575	35.3656
		684.382	40	683.364	36	21576	10.0013	21576	29.0795
		684.386	40	683.368	36	21577	13.7668	21577	23.9628
		684.39	40	683.376	36	21578	17.8126	21578	20.0599
		684.394	40	683.392	36	21579	20.3652	21579	17.2396
		684.49	40	683.4	54	21580	21.535	21580	15.7362
		684.69	40	683.404	36	21581	23.039	21581	14.6893
		684.71	40	683.46	36	21582	28.6879	21582	13.414
		684.811	40	683.468	36	21583	42.2287	21583	12.4
		684.959	40	683.492	36	21584	59.6921	21584	11.7149
		684.999	40	683.676	54	21585	70.2853	21585	10.43
		685.031	40	683.836	36	21586	69.4972	21586	8.8325
		685.075	40	683.872	54	21587	60.1778	21587	8.0637
		685.095	40	683.876	72	21588	45.2456	21588	7.85437
		685.151	40	683.88	36	21589	29.5444	21589	7.70295
		685.195	40	683.884	54	21590	19.1484	21590	8.08022
		685.243	40	683.888	36	21591	15.3175	21591	8.89535
		685.255	40	684.136	54	21592	14.5147	21592	9.41984
		685.335	40	684.317	54	21593	13.5238	21593	9.52082
		685.339	40	684.325	36	21594	11.7447	21594	9.29021
		685.348	40	684.333	72	21595	9.58641	21595	8.4338
		685.36	60	684.353	36	21596	7.39156	21596	6.9391
		685.368	60	684.357	54	21597	5.64287	21597	5.6698
		685.376	40	684.361	36	21598	4.80293	21598	5.49416
		685.388	60	684.365	36	21599	4.61293	21599	6.14457
		685.396	40	684.369	36	21600	4.323	21600	6.61631
		685.684	40	684.373	54	21601	3.84476	21601	6.6324
		685.748	40	684.401	36	21602	3.66851	21602	6.72731
		685.837	40	684.429	36	21603	3.92013	21603	6.84597
		685.853	40	684.497	36	21604	4.40934	21604	6.47709
		686.065	40	684.573	36	21605	5.03793	21605	5.82388
		686.117	40	684.657	36	21606	5.52182	21606	5.40393
		686.141	40	684.709	36	21607	5.30672	21607	5.24313
		686.145	40	684.833	36	21608	4.27812	21608	5.20659
		686.153	60	684.853	36	21609	3.04218	21609	5.34743
		686.346	60	684.901	36	21610	2.15326	21610	5.57599
		686.37	60	684.97	36	21611	1.63308	21611	5.48802
		686.386	40	684.974	36	21612	1.33168	21612	4.76236
		686.438	40	685.086	36	21613	1.27779	21613	3.69809
		686.47	40	685.09	36	21614	1.61669	21614	3.08809
		686.631	40	685.35	36	21615	2.25569	21615	3.41471
		686.707	40	685.394	36	21616	2.7409	21616	4.32167
		686.835	60	685.41	36	21617	2.76132	21617	4.94117
		686.984	40	685.426	54	21618	2.48093	21618	4.92335
		687.044	40	685.847	36	21619	2.11884	21619	4.63427
		687.076	40	685.855	36	21620	1.6922	21620	4.34524
		687.213	60	685.859	36	21621	1.26922	21621	4.13157
		687.253	40	685.867	72	21622	1.02111	21622	4.06733
		687.289	40	685.92	36	21623	1.04761	21623	4.19961
		687.317	60	685.984	36	21624	1.30376	21624	4.70824
		687.325	40	686.088	36	21625	1.62571	21625	5.67661
		687.329	80	686.112	36	21626	1.85508	21626	6.55541
		687.337	40	686.132	36	21627	1.93724	21627	6.57535
		687.345	40	686.172	36	21628	1.90642	21628	5.99888
		687.349	60	686.309	36	21629	1.88309	21629	5.70927
		687.353	40	686.321	36	21630	1.98951	21630	5.70146
		687.357	60	686.329	36	21631	2.27116	21631	5.65134
		687.361	40	686.337	36	21632	2.86737	21632	5.80343
		687.381	40	686.341	54	21633	4.01879	21633	6.2106
		687.385	40	686.345	36	21634	5.7759	21634	6.30129
		687.389	40	686.353	54	21635	7.84502	21635	5.51934
		687.397	40	686.357	54	21636	9.48969	21636	4.0707
		687.417	40	686.365	72	21637	9.94129	21637	2.71036
		687.498	60	686.369	36	21638	9.40266	21638	1.88598
		687.518	40	686.381	36	21639	8.61926	21639	1.56541
		687.53	40	686.557	36	21640	7.59279	21640	1.53804
		687.542	40	686.565	36	21641	6.2269	21641	1.56339
		687.606	40	686.942	36	21642	5.11631	21642	1.47112
		687.638	40	687.007	36	21643	4.61625	21643	1.27172
		687.706	40	687.023	54	21644	4.4774	21644	1.13691
		687.823	40	687.191	36	21645	4.46746	21645	1.23042
		687.839	40	687.284	36	21646	4.68927	21646	1.57755
		687.875	40	687.292	36	21647	5.68961	21647	2.08931
		687.939	40	687.3	36	21648	7.68706	21648	2.64189
		687.987	40	687.304	36	21649	9.57053	21649	3.11852
		688.024	40	687.308	54	21650	10.5026	21650	3.50473
		688.036	40	687.312	72	21651	11.2328	21651	3.97827
		688.196	40	687.316	90	21652	12.4837	21652	4.81783
		688.329	40	687.32	197	21653	14.1469	21653	5.99239
		688.353	40	687.324	126	21654	15.1735	21654	6.74847
		688.357	60	687.328	126	21655	14.5463	21655	6.41226
		688.393	40	687.332	269	21656	13.0197	21656	5.62203
		688.526	40	687.336	179	21657	11.743	21657	5.38742
		688.594	40	687.34	179	21658	11.3374	21658	5.41061
		688.622	40	687.344	197	21659	12.5791	21659	4.86404
		688.678	80	687.348	108	21660	14.9731	21660	3.87207
		688.702	40	687.352	108	21661	16.2787	21661	3.04327
		688.714	40	687.356	36	21662	15.2833	21662	2.60556
		688.718	40	687.36	72	21663	12.979	21663	2.49383
		688.747	40	687.364	36	21664	10.6762	21664	2.58837
		688.799	40	687.368	36	21665	9.25518	21665	2.77189
		688.807	40	687.372	54	21666	9.11653	21666	2.97237
		688.835	60	687.4	54	21667	9.6486	21667	3.25315
		688.839	60	687.697	36	21668	10.2174	21668	3.67176
		688.843	60	687.717	36	21669	10.9127	21669	4.11452
		688.847	99	687.814	36	21670	11.3965	21670	4.46532
		688.855	139	687.846	36	21671	10.7031	21671	4.63991
		688.859	40	687.854	36	21672	8.79385	21672	4.63173
		688.867	60	687.89	36	21673	6.84335	21673	4.52679
		688.915	40	687.97	36	21674	5.75208	21674	4.30847
		688.935	40	687.978	36	21675	5.61196	21675	4.03687
		688.948	40	688.299	54	21676	6.46669	21676	3.81093
		688.968	60	688.312	36	21677	8.55048	21677	3.47592
		688.976	60	688.32	36	21678	12.0613	21678	3.01853
		689	40	688.324	54	21679	17.0246	21679	2.85369
		689.008	40	688.332	72	21680	21.6292	21680	3.2686
		689.024	40	688.336	90	21681	22.4312	21681	3.92073
		689.032	40	688.34	90	21682	19.8052	21682	4.30269
		689.04	40	688.344	36	21683	17.4791	21683	4.41878
		689.084	40	688.348	54	21684	16.0979	21684	4.52226
		689.104	40	688.352	108	21685	14.5154	21685	4.69307
		689.165	40	688.356	72	21686	12.6846	21686	4.78913
		689.169	40	688.364	54	21687	10.4925	21687	4.57289
		689.221	40	688.368	54	21688	8.36441	21688	4.29495
		689.317	40	688.372	54	21689	7.34252	21689	4.67952
		689.329	40	688.38	54	21690	7.77601	21690	5.71058
		689.341	40	688.388	36	21691	9.10734	21691	6.32188
		689.349	40	688.432	36	21692	9.98072	21692	5.94535
		689.353	99	688.609	36	21693	9.37973	21693	5.04715
		689.398	40	688.677	36	21694	7.93655	21694	3.94226
		689.478	60	689.019	36	21695	7.04557	21695	2.71221
		689.695	40	689.031	36	21696	7.43786	21696	1.6713
		689.711	40	689.099	36	21697	9.18838	21697	1.02692
		689.804	60	689.212	36	21698	12.7808	21698	0.80264
		689.844	40	689.216	36	21699	19.4442	21699	1.02891
		689.989	40	689.312	54	21700	29.2113	21700	1.68065
		690.013	40	689.32	36	21701	39.8364	21701	2.53312
		690.238	40	689.332	36	21702	47.7411	21702	3.284
		690.246	40	689.34	36	21703	49.4469	21703	3.81249
		690.323	40	689.344	36	21704	45.3488	21704	4.00879
		690.351	60	689.36	36	21705	39.734	21705	3.72701
		690.359	40	689.372	36	21706	35.1194	21706	3.13189
		690.375	40	689.376	36	21707	32.1284	21707	2.5354
		690.568	40	689.557	36	21708	33.1795	21708	2.06011
		690.93	60	689.638	72	21709	39.4511	21709	1.71006
		691.039	40	690.156	36	21710	44.8257	21710	1.47266
		691.321	40	690.245	36	21711	41.1253	21711	1.36052
		691.329	40	690.253	36	21712	29.6215	21712	1.46051
		691.333	40	690.329	54	21713	18.2789	21713	1.92325
		691.381	40	690.346	36	21714	11.2082	21714	2.85859
		691.433	40	690.35	54	21715	7.66189	21715	4.26271
		691.51	40	690.362	54	21716	6.47142	21716	6.3389
		691.534	40	690.366	36	21717	7.69699	21717	9.79003
		691.538	40	690.374	36	21718	11.7067	21718	14.8361
		691.542	40	690.414	36	21719	17.9872	21719	19.4638
		691.675	60	690.547	36	21720	25.9556	21720	20.0041
		691.723	60	690.611	36	21721	36.7487	21721	15.507
		691.8	40	690.856	54	21722	51.4634	21722	9.6021
		691.836	60	690.921	36	21723	67.514	21723	5.85685
		691.872	40	691.005	36	21724	78.0829	21724	4.56433
		691.88	40	691.154	54	21725	78.1215	21725	4.34937
		691.896	40	691.178	36	21726	70.4429	21726	4.10178
		691.916	40	691.247	36	21727	59.9413	21727	3.7611
		692.009	60	691.295	36	21728	48.2728	21728	3.94345
		692.025	40	691.299	54	21729	37.5289	21729	4.92261
		692.041	80	691.36	36	21730	29.0667	21730	6.21193
		692.114	40	691.484	36	21731	21.3001	21731	7.01826
		692.206	40	691.67	36	21732	13.7657	21732	6.83102
		692.307	40	691.774	36	21733	8.10798	21733	5.74986
		692.319	40	691.782	36	21734	4.92846	21734	4.38354
		692.339	40	691.851	36	21735	3.33643	21735	3.17441
		692.356	40	691.863	36	21736	2.41558	21736	2.17713
		692.561	40	691.891	36	21737	1.73636	21737	1.4111
		692.621	40	692.032	36	21738	1.22299	21738	0.920757
		692.843	80	692.149	36	21739	0.93536	21739	0.668506
		692.847	40	692.173	36	21740	0.880149	21740	0.562864
		692.968	40	692.346	54	21741	0.988737	21741	0.554615
		693.008	40	692.35	36	21742	1.19384	21742	0.632979
		693.069	40	692.358	54	21743	1.49017	21743	0.774751
		693.085	40	692.37	54	21744	1.88933	21744	0.96918
		693.113	40	692.378	54	21745	2.3109	21745	1.17256
		693.117	60	692.467	36	21746	2.63565	21746	1.24758
		693.178	40	692.475	36	21747	2.90527	21747	1.12815
		693.182	60	692.709	36	21748	3.29061	21748	0.952806
		693.242	40	692.721	36	21749	3.81683	21749	0.950952
		693.286	60	692.733	36	21750	4.41234	21750	1.27106
		693.294	40	692.822	36	21751	5.00574	21751	1.86198
		693.303	60	692.858	36	21752	5.3935	21752	2.49555
		693.307	40	692.866	36	21753	5.4828	21753	2.86679
		693.311	40	692.89	36	21754	5.45997	21754	2.73197
		693.319	60	692.947	36	21755	5.55245	21755	2.19409
		693.331	40	693.051	36	21756	5.88443	21756	1.66455
		693.343	40	693.104	36	21757	6.31776	21757	1.40287
		693.347	40	693.172	36	21758	6.58859	21758	1.39
		693.351	80	693.265	36	21759	6.68288	21759	1.52995
		693.359	60	693.285	36	21760	6.63321	21760	1.74292
		693.472	40	693.301	72	21761	6.32016	21761	1.98147
		693.601	40	693.309	54	21762	5.82304	21762	2.18688
		693.621	40	693.313	36	21763	5.574	21763	2.21913
		693.637	40	693.317	72	21764	5.8654	21764	1.98289
		693.649	40	693.33	36	21765	6.17416	21765	1.58783
		693.653	60	693.334	36	21766	5.62349	21766	1.21722
		693.673	40	693.346	36	21767	4.38497	21767	0.968848
		693.678	40	693.35	36	21768	3.44709	21768	0.870671
		693.69	40	693.354	54	21769	3.06841	21769	0.913875
		693.694	40	693.37	54	21770	2.82168	21770	1.09255
		693.799	40	693.426	36	21771	2.61193	21771	1.39497
		693.819	60	693.495	36	21772	2.65373	21772	1.73458
		693.948	40	693.616	54	21773	2.95667	21773	2.00275
		693.952	40	693.62	36	21774	3.30897	21774	2.25588
		693.956	40	693.624	54	21775	3.51677	21775	2.67734
		693.96	80	693.632	54	21776	3.47112	21776	3.19118
		693.968	40	693.636	36	21777	3.15864	21777	3.53244
		693.976	40	693.64	54	21778	2.65783	21778	3.75421
		693.98	60	693.648	36	21779	2.08026	21779	4.09814
		694.101	40	693.801	54	21780	1.54143	21780	4.60235
		694.149	40	693.821	36	21781	1.1243	21781	5.05048
		694.234	40	693.846	54	21782	0.866481	21782	5.12589
		694.274	40	693.858	54	21783	0.721056	21783	4.75935
		694.283	40	693.862	36	21784	0.589275	21784	4.25687
		694.291	40	693.89	36	21785	0.482486	21785	4.07958
		694.295	99	693.934	36	21786	0.485669	21786	4.5131
		694.303	40	693.942	36	21787	0.626042	21787	5.61795
		694.307	40	693.951	36	21788	0.924792	21788	7.9523
		694.311	80	693.955	36	21789	1.38121	21789	12.7984
		694.319	40	693.963	72	21790	1.81693	21790	20.1163
		694.327	80	693.967	36	21791	1.99633	21791	26.6549
		694.331	40	693.971	36	21792	1.89641	21792	28.554
		694.347	40	693.975	36	21793	1.65439	21793	25.3608
		694.367	40	693.991	54	21794	1.37818	21794	19.3768
		694.371	40	693.995	36	21795	1.14247	21795	12.9599
		694.375	60	694.003	36	21796	1.06867	21796	7.85211
		694.395	40	694.112	36	21797	1.26354	21797	5.03048
		694.432	60	694.16	36	21798	1.68984	21798	4.49417
		694.436	40	694.176	36	21799	2.19817	21799	5.52306
		694.508	40	694.273	36	21800	2.66335	21800	7.03755
		694.581	40	694.289	36	21801	3.0981	21801	8.39797
		694.589	80	694.297	36	21802	3.61788	21802	9.80562
		694.597	40	694.306	72	21803	4.14453	21803	11.5872
		694.617	60	694.31	54	21804	4.22014	21804	13.5288
		694.63	40	694.314	72	21805	3.53896	21805	14.4429
		694.642	40	694.318	54	21806	2.49418	21806	13.2257
		694.658	40	694.322	54	21807	1.65005	21807	10.5099
		694.674	40	694.338	36	21808	1.1181	21808	7.63119
		694.682	40	694.342	36	21809	0.754263	21809	5.23128
		694.69	40	694.362	54	21810	0.496142	21810	3.41325
		694.767	80	694.616	36	21811	0.358631	21811	2.11193
		694.771	40	694.677	36	21812	0.301058	21812	1.30414
		694.839	40	694.689	54	21813	0.253683	21813	0.915773
		694.851	40	694.826	36	21814	0.198885	21814	0.790197
		694.944	40	694.85	36	21815	0.153724	21815	0.836486
		694.948	40	694.874	36	21816	0.138942	21816	1.03299
		694.977	40	694.975	54	21817	0.166374	21817	1.37274
		695.013	40	695.137	36	21818	0.223151	21818	1.85613
		695.033	40	695.181	36	21819	0.286614	21819	2.44479
		695.106	40	695.274	36	21820	0.352834	21820	3.11573
		695.283	40	695.282	54	21821	0.413151	21821	3.88595
		695.295	40	695.29	36	21822	0.432026	21822	4.59161
		695.3	80	695.298	36	21823	0.400103	21823	5.01627
		695.304	40	695.306	36	21824	0.36159	21824	5.16863
		695.308	40	695.31	72	21825	0.350077	21825	5.16642
		695.312	80	695.314	54	21826	0.363091	21826	5.12657
		695.32	60	695.318	36	21827	0.412184	21827	5.07344
		695.324	40	695.323	36	21828	0.514454	21828	4.8536
		695.332	40	695.327	54	21829	0.637035	21829	4.33094
		695.336	40	695.331	54	21830	0.705579	21830	3.65375
		695.352	40	695.367	54	21831	0.694226	21831	3.30653
		695.372	40	695.371	36	21832	0.7188	21832	4.13138
		695.388	40	695.46	54	21833	0.945383	21833	7.34227
		695.473	40	695.569	36	21834	1.37786	21834	13.6815
		695.526	40	695.714	36	21835	1.83429	21835	21.7491
		695.623	40	695.722	36	21836	2.06498	21836	27.9345
		695.744	40	695.811	54	21837	1.89583	21837	29.0205
		695.82	40	695.819	36	21838	1.42736	21838	25.0544
		695.833	40	696.045	36	21839	0.972661	21839	19.711
		695.845	40	696.053	36	21840	0.72473	21840	16.8561
		695.853	40	696.126	36	21841	0.682061	21841	16.8082
		695.909	40	696.134	36	21842	0.780658	21842	17.4268
		695.921	60	696.259	36	21843	0.923597	21843	17.4031
		695.958	40	696.304	36	21844	1.05137	21844	16.9774
		696.022	40	696.312	54	21845	1.19026	21845	16.8005
		696.135	40	696.32	72	21846	1.3863	21846	16.9007
		696.192	40	696.324	90	21847	1.74236	21847	17.155
		696.253	40	696.328	90	21848	2.29136	21848	18.4748
		696.257	40	696.332	144	21849	2.77824	21849	21.7854
		696.297	40	696.336	126	21850	3.04626	21850	25.7983
		696.301	40	696.34	90	21851	3.3017	21851	27.6072
		696.313	40	696.344	126	21852	3.63392	21852	26.5954
		696.317	60	696.348	161	21853	3.89526	21853	25.4564
		696.321	80	696.352	126	21854	4.08847	21854	26.165
		696.325	60	696.356	36	21855	4.37981	21855	28.0462
		696.329	80	696.36	36	21856	4.66944	21856	29.1702
		696.333	99	696.365	36	21857	4.56968	21857	27.8039
		696.337	99	696.369	54	21858	4.04891	21858	23.7039
		696.341	199	696.373	36	21859	3.56226	21859	18.395
		696.346	80	696.377	36	21860	3.51804	21860	14.2325
		696.35	259	696.389	36	21861	4.16383	21861	12.2102
		696.354	179	696.393	36	21862	5.771	21862	11.0103
		696.358	159	696.405	36	21863	8.23337	21863	9.37696
		696.362	139	696.413	36	21864	10.3958	21864	7.51821
		696.366	60	696.474	36	21865	10.5215	21865	6.12069
		696.378	80	696.542	36	21866	8.27973	21866	5.58491
		696.382	60	696.579	36	21867	5.40869	21867	5.74809
		696.39	40	696.595	36	21868	3.49412	21868	6.42171
		696.394	40	696.611	36	21869	2.59794	21869	8.02964
		696.406	40	696.781	36	21870	2.18154	21870	10.5475
		696.43	40	696.841	36	21871	1.9217	21871	12.3767
		696.483	40	696.845	36	21872	1.75466	21872	12.1112
		696.737	40	696.858	54	21873	1.72296	21873	10.875
		696.742	40	696.87	36	21874	1.97031	21874	10.7828
		696.847	40	696.886	54	21875	2.68927	21875	11.9284
		696.863	40	696.89	36	21876	3.67057	21876	12.5796
		696.883	40	696.898	36	21877	4.22452	21877	11.9124
		696.903	60	696.93	36	21878	3.99785	21878	10.9135
		696.923	40	696.938	36	21879	3.35612	21879	10.4372
		697.057	40	697.064	36	21880	2.76823	21880	10.0832
		697.097	40	697.173	36	21881	2.39931	21881	8.94816
		697.101	60	697.31	36	21882	2.16861	21882	6.98474
		697.105	40	697.314	36	21883	1.84615	21883	5.22052
		697.134	60	697.318	36	21884	1.37984	21884	4.31501
		697.146	40	697.322	72	21885	1.01007	21885	4.13658
		697.315	40	697.326	36	21886	0.890718	21886	4.53472
		697.32	40	697.335	36	21887	0.986079	21887	5.40447
		697.324	40	697.343	36	21888	1.27256	21888	6.41366
		697.328	80	697.347	126	21889	1.74773	21889	7.21094
		697.336	60	697.359	36	21890	2.31603	21890	7.48761
		697.34	119	697.363	36	21891	2.83757	21891	7.07429
		697.344	99	697.367	54	21892	3.25502	21892	6.32737
		697.348	80	697.399	54	21893	3.46961	21893	5.64855
		697.352	60	697.415	36	21894	3.35848	21894	5.04835
		697.356	40	697.496	36	21895	3.17579	21895	4.47241
		697.36	80	697.553	54	21896	3.56375	21896	3.91
		697.364	40	697.565	72	21897	5.16106	21897	3.38435
		697.368	60	697.589	36	21898	8.38926	21898	2.96856
		697.372	40	697.597	54	21899	13.1523	21899	2.75714
		697.38	60	697.605	54	21900	18.6757	21900	2.8042
		697.554	40	697.618	36	21901	23.7024	21901	3.00708
		697.574	40	697.63	54	21902	27.196	21902	3.26186
		697.578	60	697.735	36	21903	29.8341	21903	3.71459
		697.59	80	697.779	72	21904	33.804	21904	4.54369
		697.607	40	697.88	36	21905	39.1171	21905	5.63582
		697.764	40	697.909	54	21906	41.4761	21906	6.46117
		697.768	40	697.929	36	21907	38.7295	21907	6.36619
		697.849	60	697.941	36	21908	34.5297	21908	5.4057
		697.967	40	697.945	36	21909	30.5745	21909	4.33371
		697.987	80	697.973	54	21910	25.8613	21910	3.66231
		698.011	40	698.054	36	21911	21.7569	21911	3.26186
		698.112	40	698.16	36	21912	19.3686	21912	2.76806
		698.193	40	698.297	36	21913	17.8489	21913	2.14508
		698.201	40	698.301	36	21914	16.7343	21914	1.63755
		698.234	40	698.309	36	21915	16.184	21915	1.36323
		698.254	40	698.338	72	21916	15.7339	21916	1.23321
		698.262	40	698.354	36	21917	14.7423	21917	1.14777
		698.282	40	698.358	54	21918	13.3211	21918	1.16872
		698.314	40	698.362	90	21919	12.1046	21919	1.36085
		698.335	40	698.374	36	21920	12.316	21920	1.61371
		698.343	40	698.406	36	21921	15.0285	21921	1.94518
		698.355	40	698.451	36	21922	19.1775	21922	2.60832
		698.359	119	698.552	54	21923	22.2464	21923	3.69549
		698.375	40	698.625	36	21924	23.3403	21924	5.08153
		698.428	40	698.641	36	21925	22.8423	21925	6.49773
		698.436	40	698.856	36	21926	20.3922	21926	7.86003
		698.565	40	698.985	36	21927	16.6463	21927	9.73946
		698.893	40	698.997	36	21928	14.1991	21928	12.1533
		698.962	40	699.321	54	21929	14.2454	21929	13.5613
		698.978	40	699.325	36	21930	14.9904	21930	12.7881
		698.99	40	699.349	72	21931	15.2016	21931	10.7086
		699.075	40	699.357	36	21932	16.7455	21932	8.86148
		699.168	40	699.414	36	21933	21.3478	21933	7.72713
		699.253	60	699.426	36	21934	27.2105	21934	7.10921
		699.29	40	699.438	36	21935	30.5753	21935	6.86978
		699.314	40	699.479	36	21936	29.4406	21936	6.80544
		699.342	60	699.524	36	21937	24.85	21937	6.79131
		699.363	40	699.548	36	21938	19.6684	21938	7.16997
		699.428	40	699.56	36	21939	16.5639	21939	8.44147
		699.525	40	699.621	36	21940	16.0375	21940	10.4195
		699.626	40	699.625	36	21941	17.0654	21941	12.0752
		699.707	60	699.641	36	21942	19.3262	21942	12.7406
		699.711	40	699.677	36	21943	22.7645	21943	12.4932
		699.8	40	699.762	36	21944	25.9566	21944	11.2479
		699.873	40	699.827	54	21945	26.7724	21945	9.28673
		699.982	40	699.856	36	21946	24.5108	21946	7.66596
		700.043	40	699.88	36	21947	20.5353	21947	7.00623
		700.181	40	699.884	36	21948	16.5281	21948	7.24521
		700.29	40	700.062	36	21949	13.0163	21949	8.08286
		700.302	40	700.188	36	21950	9.98629	21950	8.84311
		700.306	60	700.265	72	21951	7.75326	21951	8.96756
		700.327	40	700.269	54	21952	6.41451	21952	8.62831
		700.335	60	700.293	36	21953	5.46079	21953	8.13686
		700.339	60	700.301	36	21954	4.4688	21954	7.67305
		700.355	40	700.305	90	21955	3.51682	21955	7.58184
		700.363	40	700.309	54	21956	2.79124	21956	7.84825
		700.367	80	700.313	54	21957	2.15597	21957	7.87962
		700.375	60	700.334	36	21958	1.48926	21958	7.36123
		700.404	40	700.354	54	21959	0.983072	21959	6.97569
		700.501	40	700.366	36	21960	0.775515	21960	8.18716
		700.517	40	700.39	36	21961	0.795235	21961	11.6054
		700.602	40	700.431	36	21962	0.935483	21962	15.0762
		700.663	40	700.552	36	21963	1.12656	21963	15.7139
		700.72	60	700.581	36	21964	1.39725	21964	13.9302
		700.724	40	700.792	54	21965	1.83178	21965	12.1142
		700.764	40	700.84	36	21966	2.32354	21966	11.0115
		700.768	40	700.873	36	21967	2.59671	21967	9.92054
		700.772	40	700.978	36	21968	2.58167	21968	8.50951
		700.809	40	701.039	36	21969	2.52933	21969	7.40155
		700.817	40	701.051	54	21970	2.70341	21970	7.392
		700.862	40	701.108	36	21971	3.09638	21971	8.34247
		700.878	40	701.173	36	21972	3.53108	21972	9.27475
		700.91	60	701.343	54	21973	4.09155	21973	9.3912
		700.947	40	701.347	54	21974	5.09639	21974	8.72874
		700.991	40	701.351	54	21975	6.15235	21975	7.99283
		701.04	80	701.359	54	21976	6.13878	21976	7.56054
		701.085	40	701.363	72	21977	4.87648	21977	7.00241
		701.093	40	701.367	54	21978	3.42974	21978	6.05721
		701.194	40	701.375	72	21979	2.60052	21979	5.13249
		701.202	60	701.379	36	21980	2.35438	21980	4.609
		701.308	40	701.396	36	21981	2.4012	21981	4.52439
		701.332	80	701.412	36	21982	2.70625	21982	4.88487
		701.34	40	701.598	36	21983	3.32655	21983	5.70826
		701.344	80	701.736	54	21984	4.16711	21984	7.06098
		701.348	40	701.773	36	21985	5.31417	21985	9.69072
		701.352	40	701.797	36	21986	6.94905	21986	14.5937
		701.356	119	701.817	36	21987	8.7446	21987	20.8521
		701.36	80	701.846	36	21988	9.85061	21988	25.4134
		701.364	60	701.866	36	21989	9.62159	21989	26.1812
		701.372	60	701.874	36	21990	8.25727	21990	23.6072
		701.376	40	701.878	36	21991	6.43297	21991	19.1165
		701.385	60	701.882	36	21992	4.7472	21992	14.1841
		701.389	40	701.89	36	21993	3.73507	21993	10.2007
		701.417	40	701.927	36	21994	3.48891	21994	7.57001
		701.437	40	702.105	36	21995	3.40674	21995	5.62486
		701.454	40	702.118	36	21996	3.02954	21996	3.91752
[truncated: 114,702 more rows]
